# Supplementary material for: Can the Healthy Primary School of the Future offer perspective in the ongoing obesity epidemic in young children? A Dutch quasi-experimental study
Source: PubMed Central journal article supplement — BMJ Open. 2019 Oct 31;9(10):e030676. doi: 10.1136/bmjopen-2019-030676 (PMC6830668; doi:10.1136/bmjopen-2019-030676), 2019-10-31
Supplement: bmjopen-2019-030676.draft_revisions.pdf [file bmjopen-2019-030676.draft_revisions.pdf]

# BMJ Open

BMJ Open is committed to open peer review. As part of this commitment we make the peer review history of every article we publish publicly available.

When an article is published we post the peer reviewers' comments and the authors' responses online. We also post the versions of the paper that were used during peer review. These are the versions that the peer review comments apply to.

The versions of the paper that follow are the versions that were submitted during the peer review process. They are not the versions of record or the final published versions. They should not be cited or distributed as the published version of this manuscript.

BMJ Open is an open access journal and the full, final, typeset and author-corrected version of record of the manuscript is available on our site with no access controls, subscription charges or pay-per-view fees (<http://bmjopen.bmj.com>).

If you have any questions on BMJ Open's open peer review process please email [info.bmjopen@bmj.com](mailto:info.bmjopen@bmj.com)

# BMJ Open

## Can the Healthy Primary School of the Future offer perspective in the on-going obesity epidemic in young children? – a quasi-experimental study

|                               |                                                                                                                                                                                                                                                                                                                                                                                                                                                                                   |
|-------------------------------|-----------------------------------------------------------------------------------------------------------------------------------------------------------------------------------------------------------------------------------------------------------------------------------------------------------------------------------------------------------------------------------------------------------------------------------------------------------------------------------|
| Journal:                      | <i>BMJ Open</i>                                                                                                                                                                                                                                                                                                                                                                                                                                                                   |
| Manuscript ID                 | bmjopen-2019-030676                                                                                                                                                                                                                                                                                                                                                                                                                                                               |
| Article Type:                 | Research                                                                                                                                                                                                                                                                                                                                                                                                                                                                          |
| Date Submitted by the Author: | 26-Mar-2019                                                                                                                                                                                                                                                                                                                                                                                                                                                                       |
| Complete List of Authors:     | Bartelink, N; Maastricht University,<br>van Assema, Patricia; Maastricht University<br>Kremers, Stef; Maastricht University<br>Savelberg, H. H.; Maastricht University<br>Oosterhoff, Marije; Maastricht University Medical Centre<br>Willeboordse, Maartje; Maastricht University<br>van Schayck, Onno; Maastricht University, HAG<br>Winkens, Bjorn; Maastricht University,<br>Jansen, Maria; Academic Collaborative Centre for Public Health Limburg;<br>Maastricht University |
| Keywords:                     | PUBLIC HEALTH, PREVENTIVE MEDICINE, Community child health < PAEDIATRICS                                                                                                                                                                                                                                                                                                                                                                                                          |
|                               |                                                                                                                                                                                                                                                                                                                                                                                                                                                                                   |

SCHOLARONE™  
Manuscripts

# Can the Healthy Primary School of the Future offer perspective in the on-going obesity epidemic in young children? – a quasi-experimental study

1  
2  
3  
4  
5  
6  
7  
8  
9  
10  
11  
12  
13  
14  
15  
16  
17  
18  
19  
20  
21  
22  
23  
24  
25  
26  
27  
28  
29  
30  
31  
32  
33  
34  
35  
36  
37  
38  
39  
40  
41  
42  
43  
44  
45  
46  
47  
48  
49  
50  
51  
52  
53  
54  
55  
56  
57  
58  
59  
60

1 Nina H.M. Bartelink, MSc <sup>1,2,3\*</sup> [n.bartelink@maastrichtuniversity.nl](mailto:n.bartelink@maastrichtuniversity.nl); +31 43 3882401  
2 Patricia van Assema, PhD <sup>1,2</sup> [p.vanassema@maastrichtuniversity.nl](mailto:p.vanassema@maastrichtuniversity.nl); +31 43 3882403  
3 Stef P.J. Kremers, PhD <sup>2</sup> [s.kremers@maastrichtuniversity.nl](mailto:s.kremers@maastrichtuniversity.nl); +31 43 3882431  
4 Hans H.C.M. Savelberg, PhD <sup>5</sup> [hans.savelberg@maastrichtuniversity.nl](mailto:hans.savelberg@maastrichtuniversity.nl); +31 43 3881392  
5 Marije Oosterhoff, MSc <sup>6</sup> [marije.oosterhoff@mumc.nl](mailto:marije.oosterhoff@mumc.nl); +31 43 3875587  
6 Maartje Willeboordse, PhD <sup>7</sup> [maartje.willeboordse@maastrichtuniversity.nl](mailto:maartje.willeboordse@maastrichtuniversity.nl); +31 43 3884103  
7 Onno C.P. van Schayck, PhD <sup>7</sup> [onno.vanschayck@maastrichtuniversity.nl](mailto:onno.vanschayck@maastrichtuniversity.nl); +31 43 3882150  
8 Bjorn Winkens, PhD <sup>8</sup> [bjorn.winkens@maastrichtuniversity.nl](mailto:bjorn.winkens@maastrichtuniversity.nl); +31 43 3882433  
9 Maria W.J. Jansen, PhD <sup>3,4</sup> [maria.jansen@ggdzl.nl](mailto:maria.jansen@ggdzl.nl); +31 43 3881567

16 1 Department of Health Promotion, Care and Public Health Research Institute (CAPHRI), Maastricht  
17 University, P.O. Box 616 6200 MD Maastricht, The Netherlands.

18 2 Department of Health Promotion, School of Nutrition and Translational Research in Metabolism  
19 (NUTRIM), Maastricht University, P.O. Box 616, 6200 MD Maastricht, The Netherlands

20 3 Academic Collaborative Centre for Public Health Limburg, Public Health Services, P.O. Box 33, 6400  
21 AA Heerlen, The Netherlands

22 4 Department of Health Services Research, Care and Public Health Research Institute (CAPHRI),  
23 Maastricht University, P.O. Box 616, 6200 MD Maastricht, The Netherlands

24 5 Department of Nutrition and Movement Sciences, Nutrition and Translational Research in Metabolism  
25 (NUTRIM), Maastricht University, P.O. Box 616, 6200 MD Maastricht, The Netherlands

26 6 Department of Clinical Epidemiology and Medical Technology Assessment (KEMTA), Maastricht  
27 University Medical Centre MUMC+/- Care and Public Health Research Institute (CAPHRI), Maastricht  
28 University, P.O. Box 5800, 6202 AZ Maastricht, The Netherlands.

29 7 Department of Family Medicine, Care and Public Health Research Institute (CAPHRI), Maastricht  
30 University, P.O. Box 616, 6200 MD Maastricht, The Netherlands.

31 8 Department of Methodology and Statistics, Care and Public Health Research Institute (CAPHRI),  
32 Maastricht University, P.O. Box 616, 6200 MD Maastricht, The Netherlands

33  
34 \* Corresponding author: [n.bartelink@maastrichtuniversity.nl](mailto:n.bartelink@maastrichtuniversity.nl); Telephone: +31 43 3882401

1  
2  
3 **38 Abstract**

4  
5 **39 Objectives:** Schools play an important role in promoting healthy behaviours in children and can offer  
6  
7 **40** perspective in the on-going obesity epidemic. The 'Healthy Primary School of the Future' (HPSF) aims  
8  
9 **41** to improve children's health and well-being by enhancing school health promotion. The current study  
10  
11 **42** aims to assess the effect of HPSF on children's BMI z-score after one and two years' follow-up and to  
12  
13 **43** investigate whether HPSF has different effects within specific subgroups of children.

14  
15 **44 Design:** A longitudinal quasi-experimental design.

16  
17 **45 Setting:** Four intervention and four control schools participated; located in a low socio-economic status  
18  
19 **46** region in the Netherlands.

20  
21 **47 Participants:** 1676 children (aged 4-12 years).

22  
23 **48 Interventions:** HPSF uses a contextual systems approach and includes health-promoting changes in  
24  
25 **49** the school. Central to HPSF are the provision of a daily healthy lunch and structured physical activity  
26  
27 **50** sessions each day. Two intervention schools implemented both changes (full HPSF), two intervention  
28  
29 **51** schools implemented only the physical activity change (partial HPSF).

30  
31 **52 Main outcome measures:** BMI z-score, determined by measurements of children's height and weight  
32  
33 **53** at baseline, after one and two years' follow-up.

34  
35 **54 Results:** The intervention effect was significant after one-year follow-up in the partial HPSF  
36  
37 **55** (standardized effect size  $ES=-0.05$ ), not significant in the full HPSF ( $ES=-0.04$ ). After two years' follow-  
38  
39 **56** up, BMI z-score had significantly decreased in children of both the full HPSF ( $ES=-0.08$ ) and the partial  
40  
41 **57** HPSF ( $ES=-0.07$ ) compared with children of the control schools, whose mean BMI z-score increased  
42  
43 **58** from baseline to two years. None of the potential effect-modifiers (gender, baseline study year, socio-  
44  
45 **59** economic status, and baseline weight status) were significant.

46  
47 **60 Conclusions:** HPSF was effective after one and two years' follow-up in lowering children's BMI z-  
48  
49 **61** scores. No specific subgroups of children could be identified who benefitted more from the intervention.

50  
51 **62 Trial registration:** The study was registered in the ClinicalTrials.gov database on 14 June 2016  
52  
53 **63** (NCT02800616).

54 **64**

55 **65**

56 **66**

57 **67**

58

59

60

1  
2  
3 **68 Strengths and limitations of this study**  
4

- 5 69 • Due to the longitudinal quasi-experimental study design, we were able to test the effectiveness  
6  
7 70 in terms of differences in children's health behaviours between the three school groups over  
8  
9 71 time, and were also able to enroll schools on the basis of motivation, which reflects the real-life  
10  
11 72 situation of school health promotion.  
12  
13 73 • Since the lack of randomization could have resulted in confounding bias, we controlled for  
14  
15 74 baseline BMI z-score, gender, study year at T0, SES score, and ethnicity in all analyses.  
16  
17 75 • The high number of children enrolled in the measurements, the low drop-out rate, and the  
18  
19 76 objectively measured BMI were strengths of this study.  
20  
21 77 • Due to some missing data, multiple imputations were used and a sensitivity analysis was  
22  
23 78 conducted, where only complete cases were included.  
24  
25 79 • Participants did not significantly differ from non-responders in the participating schools and other  
26  
27 80 children in the region with regard to health and lifestyle.  
28

29  
30  
31  
32  
33  
34  
35  
36  
37  
38  
39  
40  
41  
42  
43  
44  
45  
46  
47  
48  
49  
50  
51  
52  
53  
54  
55  
56  
57  
58  
59  
60

## 82 Introduction

83 Overweight and obesity can lead to health problems, such as type 2 diabetes, cardiovascular diseases,  
84 and psychological problems (e.g., low self-esteem) [1, 2]. Globally, the prevalence of overweight and  
85 obesity among children and adolescents (aged 5-19) has risen dramatically from 4% in 1975 to more  
86 than 18% in 2016 [3, 4]. The prevalence is highest among children with a low socio-economic  
87 background [5]. In the Netherlands, the prevalence of childhood overweight and obesity has also  
88 increased in the last decennia: 13–15% of children (aged 2–21 years) are overweight, and 1.8–2.2%  
89 are classified as obese, which is a 2- to 3-fold increase compared with 1980 [6]. The ongoing epidemic  
90 increase is particularly caused by unhealthy behaviours, such as unhealthy dietary intake and low levels  
91 of physical activity (PA) [7]. Such unhealthy behaviours at a young age often track into adulthood [8]  
92 and are related to health and psychosocial problems, reduced quality of life, higher health care costs,  
93 and lower educational achievement and labor participation [9-11]. A vicious circle is emerging,  
94 transferring problems, such as obesity, from one generation to the next [12]. Promoting healthy  
95 behaviours at an early age may help to improve children's health as well as their educational  
96 achievements; both may lead to improved health in later life [13].

97  
98 Schools can play an important role in promoting healthy behaviours in children and thereby help to offer  
99 perspective in the on-going obesity epidemic in young children, since a significant proportion of a child's  
100 day is spent there, and schools reach all children [14-16]. Many different school-based interventions  
101 (e.g. related to education, environment, policy, monitoring) have been implemented to integrate health  
102 into the school system and reduce childhood overweight and obesity. The meta-analysis of both  
103 Cook-Cottone et al. and Oosterhoff et al. found that the significant effect of school-based interventions  
104 on children's Body Mass Index (BMI) z-score had an overall weighted effect size of approximately -0.05  
105 [17, 18]. Several studies indicated that effects are often hampered by underestimation of the challenges  
106 associated with implementing meaningful changes to the school system [19-21]. These challenges occur  
107 because an intervention always interacts with the specific school context [20, 21]. Therefore, solutions  
108 for the challenges associated with changing school systems vary between schools as they all have their  
109 own dynamics [20-22]. Consequently, an intervention can be seen as an attempt to positively disrupt  
110 the prior functioning of a school system [23, 24]. Some other reviews stated that specific subgroups of  
111 children benefit more from a school-based intervention. The review of Stewart-Brown et al. [25] found

1  
2  
3 112 that several studies indicated gender-specific results, with some school-based interventions being more  
4  
5 113 effective in girls and others in boys. Age-specific effects were often found, with some interventions being  
6  
7 114 more effective in older children and others in younger children [25]. Cook-Cotton et al. found that  
8  
9 115 children's socio-economic background can be an influential factor and that children already having  
10  
11 116 overweight can respond more slowly or to a lesser extent to school-based interventions than other  
12  
13 117 children [17].

14  
15 118

16 119 A Dutch initiative that embraces a contextual systems approach is the 'Healthy Primary School of the  
17  
18 120 Future' (HPSF) [26, 27]. HPSF aims to improve the health and well-being of all children in the school  
19  
20 121 which should contribute to a healthier future generation and thereby offer perspective in the on-going  
21  
22 122 obesity epidemic [28]. HPSF includes top-down and bottom-up processes to create health-promoting  
23  
24 123 changes in the school. Two changes were initiated to create some form of positive disruption in the  
25  
26 124 school: 1) providing a free healthy lunch each day and 2) daily structured physical activity (PA) sessions  
27  
28 125 after lunch. While in other national school systems this may represent usual practice, these changes  
29  
30 126 are hypothesized as disruptive to the Dutch school system because the provision of school lunches and  
31  
32 127 structured PA sessions are not usual practice in Dutch schools. The two changes aimed to create  
33  
34 128 momentum to implement additional health-promoting changes in the school, such as a healthy school  
35  
36 129 policy or creating a PA-friendly schoolyard. All changes together should favourably affect the health  
37  
38 130 behaviours of all school children, which should lead to improved health and a more normal weight status  
39  
40 131 [26, 27].

41  
42 132

43 133 The aim of the current study was to assess the effect of HPSF on children's BMI z-score after one and  
44  
45 134 two years' follow-up and to investigate whether HPSF has different effects within specific subgroups of  
46  
47 135 children. The current study is part of an overall study to investigate the effects of HPSF. The overall  
48  
49 136 study has a broad scope and includes a multi-disciplinary research group, which focuses on many  
50  
51 137 different outcomes, such as children's health behaviours, educational achievements, and well-being.  
52  
53 138 This study explicitly concentrates on the primary outcome, BMI z-score, as described in the study design  
54  
55 139 of Willeboordse et al. [26].

56  
57 140

58  
59 141 **Methods**

## 142 **Study design**

143 The current study had a longitudinal quasi-experimental design with four intervention schools and four  
144 control schools, which maintained the school curriculum that is currently common practice in the  
145 Netherlands. Ethical approval (14-N-142) was given by the Zuyderland Medical Ethics Committee  
146 located in Heerlen (Parkstad, the Netherlands). Parents had to sign an informed consent form to  
147 participate in all measurements for themselves and their child(ren). Measurements were conducted in  
148 September-November of 2015 (T0), 2016 (T1) and 2017 (T2). A detailed description of the study and  
149 the power calculation is reported in Willeboordse et al. [26].

## 151 **The Healthy Primary School of the Future**

152 Three collaborating organisations, i.e., the regional educational board 'Movare', the regional public  
153 health services and Maastricht University, developed the idea for HPSF [26]. The two changes, i.e.  
154 providing daily a free healthy lunch and structured PA sessions after lunch, were both led by external  
155 pedagogical employees provided by childcare organizations. Two of the four intervention schools  
156 decided to implement both the daily lunch and the structured PA sessions and are referred to as the 'full  
157 HPSF'. The other two intervention schools decided to only implement the structured PA sessions, and  
158 are referred to as the 'partial HPSF'.

159 The time for having lunch (in the full HPSF) was increased to 20–30 min. The total lunch break  
160 time in these schools was prolonged by about 60 min. For this reason, the school day was extended:  
161 children of the full HPSF attend school to approximately 15:30/15:45 instead of 15:00. A dietician of the  
162 caterer developed a lunch menu cycle that changed every 10 weeks, in which at least 80% of the  
163 products met the advice of the Dutch Health Council [29]. A mid-morning snack, consisting of fruits  
164 and/or nuts, was also provided. The lunch, a bread-based cold meal, was typically Dutch. During lunch  
165 break time, the children participated several times a week in structured PA sessions; one or two times  
166 per week they could participate in cultural activities. The PA sessions were carried out in the schoolyard  
167 and, when available and needed, in parks, forest, and/or sports hall in the neighbourhood. All schools  
168 collaborated with sport clubs or other external partners to offer specific activities as well. Since the two  
169 changes were contextualized bottom-up, this resulted in some differences between schools in the form  
170 of the changes; the content remained comparable. Employees of sports and leisure organizations  
171 supported the external pedagogical employees during implementation when needed, and after a year



1  
2  
3 172 they provided a training course (8 sessions of 2h) to supply them with additional tools for how to motivate  
4  
5 173 children for active participation during the PA sessions.

6  
7 174 All schools could implement additional health-promoting changes, that fit their school context  
8  
9 175 [27, 30]. The full HPSF improved their health policy, provided water bottles to all children, and provided  
10  
11 176 an educational lunch once a week. The partial HPSF did not implement additional health-promoting  
12  
13 177 changes. Implementation started in all four intervention schools in November 2015.

14  
15 178

### 16 179 **Patient and public involvement**

17  
18 180 Public involvement was a key feature of HPSF. This intervention intended to establish a co-creation  
19  
20 181 movement in schools aimed at the systematic incorporation of health and well-being. The two top-down  
21  
22 182 changes and the additional health-promoting changes were developed and contextualized by bottom-  
23  
24 183 up involvement. Teachers and parents were involved in the adoption decision and the process of  
25  
26 184 adapting the two changes into the school context. Moreover, all four schools used a children voice group,  
27  
28 185 with representatives from each class in school, to get insight into the opinion of children regarding HPSF.  
29  
30 186 In this way, the experiences of children were being heard and the changes could be further  
31  
32 187 contextualized to fit better to the children's needs and wishes. HPSF was led by an executive board with  
33  
34 188 representatives of the three collaborating organisations: Movare, the regional public health services and  
35  
36 189 Maastricht University. They discussed the study design, the relevant outcome measures, and the  
37  
38 190 interpretation of the results. The representative of Movare advised explicitly on school and participant  
39  
40 191 recruitment and the communication to schools. No patients were involved in this study.

41  
42 192

### 43 193 **Study population**

44  
45 194 All intervention and control schools are situated in the Parkstad region in the southern part of the  
46  
47 195 Netherlands. This region has a low average socio-economic status (SES), and unhealthy lifestyle  
48  
49 196 behaviours and overweight are highly prevalent compared with the rest of the Netherlands [31]. More  
50  
51 197 information on the recruitment of the schools has been described elsewhere [26]. All children (N=2326  
52  
53 198 at T0) and their parents in the eight schools were invited to participate in the study. This included children  
54  
55 199 from study year one to eight (age 4 to 12 years), which is comparable to two years of Kindergarten and  
56  
57 200 six primary school grades. Recruitment was done via information brochures for parents. In addition, the  
58  
59 201 research team visited the classrooms to inform children about the study and encourage them to ask  
60

1  
2  
3 202 their parents for participation [26]. Due to the dynamic population in the schools (new children enter and  
4  
5 203 other children finish school each year), we focused in this study only on the children who were enrolled  
6  
7 204 in the schools at baseline till the end of this 2-year study. The population of children included in this  
8  
9 205 study were: at baseline (T0) children from study year one to seven, at T1 children from study year two  
10  
11 206 to eight, and at T2 children from study year three to eight. Children of these study years who joined the  
12  
13 207 study at T1 or T2 were included, even though no baseline data was available. Even though these  
14  
15 208 children joined the study later, they were at baseline already participating in their school and thus also  
16  
17 209 exposed to HPSF during the full 2 years of this study. Children who switched to other schools between  
18  
19 210 2015 and 2017 were excluded.

20 211

## 21 212 **Measurements**

22 213 In each school, the data were gathered annually during one week of measurements. Inter-rater variability  
23  
24 214 was minimised by training researchers according to a strict protocol [26]. Children's age, study year,  
25  
26 215 and gender were collected via the database of the educational board Movare. A digital questionnaire for  
27  
28 216 parents was used to obtain information about the children's socioeconomic background and ethnicity.  
29  
30 217 SES was calculated as the mean of standardized scores on maternal education level, paternal  
31  
32 218 educational level, and household income (adjusted for household size) [32]. The mean scores were  
33  
34 219 categorized into low, middle and high SES scores based on tertiles. Children's ethnicity was determined  
35  
36 220 by the country of birth of both parents and divided into 1) Western background (including the  
37  
38 221 Netherlands) and 2) non-Western background [33]. If one of the parents was born in a non-Western  
39  
40 222 country, the child's ethnicity was assigned to non-Western. The distinction between Western and non-  
41  
42 223 Western was created because of differences in socio-economic and cultural position between the two  
43  
44 224 backgrounds [33].

45 225

## 46 226 *BMI z-score*

47 227 Height and weight were measured in children from study year two to eight. The measurements were  
48  
49 228 integrated in the school hours allocated to physical education. Weight was measured to the nearest 0.1  
50  
51 229 kg (Weighing Scale 803, Seca, Hamburg, Germany) and height was measured to the nearest 0.1 cm  
52  
53 230 (Stadiometer 213, Seca, Birmingham, United Kingdom). Children were measured with light sports  
54  
55 231 clothing and no shoes. All anthropometric measurements were performed twice, and a third  
56  
57  
58  
59  
60

1  
2  
3 232 measurement was conducted if the difference between the first two measurements exceeded a pre-set  
4  
5 233 limit (weight  $\geq 0.2$  kg, height  $\geq 0.5$  cm). BMI was assessed by height and weight; age- and gender-  
6  
7 234 specific BMI cut-off points were used to define overweight and obesity [34]. BMI z-scores were  
8  
9 235 calculated by using Dutch reference values [6].  
10  
11 236

### 12 237 **Statistical analyses**

14 238 Data were analyzed using IBM SPSS Statistics for Windows (version 23.0. Armonk, NY: IBM Corp).  
16 239 Pearson's chi-square tests and ANOVA tests were conducted to analyze the comparability of the  
17 240 observed participant characteristics among the full HPSF, the partial HPSF, and control schools at  
18 241 baseline. Linear mixed model analyses were used to assess the longitudinal intervention effects on the  
19 242 children's BMI z-score. Since measurements were repeated within participants, we used a two-level  
20 243 model with repeated measurements as the first level and participants as the second level. The fixed part  
21 244 of the model consisted of group (full HPSF, partial HPSF, and Control), time (T0, T1, T2) and the  
22 245 interaction terms of group with time. We were not able to include class as a level in the model, because  
23 246 often several divisions of one class existed, e.g. 4a or 4b, and children often did not have fixed class  
24 247 divisions for all years. All analyses were adjusted for gender, study year at baseline, SES, and ethnicity.  
25 248 Missing covariates and BMI z-scores were imputed using multiple imputation method with fully  
26 249 conditional specification (FCS) and 10 iterations, generating 50 complete datasets. Gender, study year  
27 250 at baseline, school type, ethnicity, SES score, and BMI z-score were used to impute the missing data.  
28 251 We performed two sensitivity analyses. First, we replicated the analyses by only selecting the children  
29 252 who had no missing BMI z-score at all three time points (complete-case analysis). Second, we replicated  
30 253 the analyses while excluding children with an extremely low BMI z-score at baseline (BMI z-score  $\leq -2$ ),  
31 254 to study the effects only in children for which a decrease in BMI z-score is favorable.  
32  
33  
34  
35  
36  
37  
38  
39  
40  
41  
42  
43  
44  
45  
46  
47  
48

49 256 To study whether the intervention effects were similar for all subgroups of children, the following potential  
50 257 effect modifiers were considered: gender (boys/girls), study year at baseline (lower (1-4)/higher (5-8)  
51 258 grades), SES (low/middle/high) and baseline weight status (non-overweight/overweight). To assess this  
52 259 potential effect modification, the interaction term group\*time\*effect modifier, with all corresponding two-  
53 260 way interactions, was added to the above mentioned model. If this interaction term was significant (here  
54 261 we used a significance level of 0.10 to deal with the fact that the power of a test for interaction is relatively  
55  
56  
57  
58  
59  
60

low and we did not want to miss any effect-modification), the intervention effects were reported for all categories of the effect-modifier separately. For all other analyses, a two-sided p-value  $\leq 0.05$  was considered statistically significant. Standardized effect sizes (ES) at each time-point were included, which were defined as estimated mean difference at that time point (T1 or T2) divided by the square root of the residual variance at baseline (pooled over all three groups).

267

## 268 Results

269 Of all children (n=2326) invited to participate in the (overall) study, 60.3% joined the study at baseline  
270 (n=1403) (Figure 1). Because of the study's dynamic population, a total of 1974 children and their  
271 parents participated in the study within the two-year follow-up period (data collected at one time-point at  
272 least). Due to the selection used for the current study, i.e., only including the children who were in study  
273 year one to seven at baseline, we included 1676 children in the analysis. Of these children, 47.4% were  
274 boys, their mean age was 7.5 years old, and 94.1% had a Western ethnicity (Table 1). In total, 19.9%  
275 of these children suffered from overweight or obesity, which is higher compared with the national  
276 average of 13% [35]. BMI z-scores at baseline differed significantly between the three school groups  
277 ( $p=0.034$ ): the average BMI z-score of children in the control schools (z-score=0.232) was higher  
278 compared with children in the full HPSF (z-score=0.051) and the partial HPSF (z-score=0.092).  
279 Significantly more children suffered from overweight or obesity in these control schools (24.1%) than  
280 the full HPSF (16.5%) and the partial HPSF (17.9%) ( $p=0.006$ ).

281

282 Figure 1. *Flowchart*

283

284 Table 1. *Characteristics of study sample at baseline (T0)*

285

286 Observed data at T1 showed a decrease in BMI z-score compared with baseline in all three groups,  
287 with the full HPSF ( $\Delta z$ -score: -0.074) and the partial HPSF ( $\Delta z$ -score: -0.098) having the largest  
288 decrease, and control schools a smaller decrease ( $\Delta z$ -score: -0.018). At T2, a decrease in BMI z-score  
289 compared with baseline was observed in the full HPSF ( $\Delta z$ -score: -0.039) and the partial HPSF ( $\Delta z$ -  
290 score: -0.012), and an increase in the control schools ( $\Delta z$ -score: +0.058) (Figure 2). The extent of  
291 observed increase or decrease at T1 and T2 compared with baseline of individual children in the three

1  
2  
3 292 different groups is visualized in Figure S1 (Supplementary file 1). This figure shows that compared to  
4  
5 293 the control schools, in the full and partial HPSF a higher percentage of children had decreased BMI z-  
6  
7 294 scores. This was particularly visible after one-year follow-up. The figure also indicates that, on an  
8  
9 295 individual level, mostly minimal to moderate changes ( $-0.6 \leq \Delta z\text{-score} \leq +0.6$ ) were realized. The  
10  
11 296 variation in changes increased over time, i.e. the percentage of large and extreme decreases and  
12  
13 297 increases was larger after two years' follow-up compared with one-year follow-up.

14 298

16 299 *Figure 2. Observed change in children's BMI z-score at one year and two years' follow-up*

18 300

20 301 Mixed model analyses were conducted to study the differences in effect among the three groups. The  
21  
22 302 intervention effect was, compared with control schools, significant after one-year follow-up in the partial  
23  
24 303 HPSF (ES=-0.05), not significant in the full HPSF (ES=-0.04) (Table 2). After two years' follow-up a  
25  
26 304 significant intervention effect on children's BMI z-score was found in both versions of HPSF. Children's  
27  
28 305 BMI z-score had decreased significantly more in the full HPSF (ES=-0.08) and the partial HPSF (ES=-  
29  
30 306 0.07), compared with children of the control schools, whose estimated mean BMI z-score increased  
31  
32 307 from baseline to two years as reported above. No significant difference in effect was found between the  
33  
34 308 full and partial HPSF at T1 and T2. Both complete case analyses (N=759) and the sensitivity analyses  
35  
36 309 in which children with an extremely low BMI z-score at baseline were excluded (N<sub>excluded</sub>=14), resulted  
37  
38 310 in comparable effect sizes. None of the interaction terms of the potential effect modifiers, i.e., gender,  
39  
40 311 study year, SES and weight status, was significant (Table S1 in Supplementary file 1).

41 312

43 313 *Table 2. One- and two-year estimated intervention effects on children's BMI z-score*

45 314

47 315 **Discussion**

49 316 This study assessed the effects of HPSF on children's BMI z-score after one and two years' follow-up  
50  
51 317 compared with children of control schools. The findings showed a favorable decreasing effect at T2 on  
52  
53 318 children's BMI z-scores in both the full HPSF (standardized effect size (ES) =-0.08) and the partial HPSF  
54  
55 319 (ES=-0.07) compared with control schools, where the BMI z-score actually increased at T2 compared  
56  
57 320 with baseline. According to Lipsey's guidelines [36], these findings can be indicated as a small effect  
58  
59 321 (effect size between 0 and 0.32). These small intervention effects are promising for three reasons: 1)

1  
2  
3 322 they are already visible after two years of implementation, 2) they indicate a change in the increasing  
4  
5 323 BMI trend observed in the control schools, and 3) they are slightly higher than the effect sizes found in  
6  
7 324 several meta-analyses regarding school-based interventions [17, 18, 37]. The decrease in BMI z-score  
8  
9 325 found in this study in the full and partial HPSF can therefore be considered as a favorable and promising  
10  
11 326 intervention effect. No significant differences were found between the full and partial HPSF. The main  
12  
13 327 distinction between them was the provision of a healthy lunch. However, the process evaluation of  
14  
15 328 Bartelink et al. has shown that providing this lunch led to the implementation of additional health-  
16  
17 329 promoting changes (e.g. health promoting policy, educational lunch) [30]. Additional health-promoting  
18  
19 330 changes were not implemented in the partial HPSF [30]. However, since no significant differences were  
20  
21 331 found between the full and partial HPSF, this might indicate that the differences between the two  
22  
23 332 versions of HPSF did not have an additional favorable effect on the children's BMI z-score. Further  
24  
25 333 research is needed to investigate whether an added value of the lunch and its additional health-  
26  
27 334 promoting changes is visible in children's health behaviours.

28 335  
29  
30 336 Even though the effects of HPSF on children's BMI z-score seem promising, it is important to realize  
31  
32 337 that two years' follow-up is too short to conclude that HPSF has led to sustainable changes. The  
33  
34 338 favorable effects on children's BMI z-scores seem to indicate that the children improved their health  
35  
36 339 behaviours, but this should be investigated in more depth. A longer follow-up period is also needed to  
37  
38 340 study whether the results found are not only due to the children's enthusiasm for and cooperation with  
39  
40 341 the new changes in school, which might result in intervention effects that diminish after longer follow-up  
41  
42 342 periods. This can be the reason for the smaller observed change scores after two years' follow-up  
43  
44 343 compared to after one year, shown in Figure 2. On the other hand, the favorable results that are still  
45  
46 344 found after two years' follow-up might indicate that new habits and routines have developed in children's  
47  
48 345 health behaviours. The latter is not easy to change and requires a shift in the social norms of all people  
49  
50 346 in the school regarding 'normal' health behaviours. Therefore, further research into HPSF should  
51  
52 347 investigate its long-term effects on children's BMI z-score. Other outcomes should also be investigated  
53  
54 348 to study the effects of HPSF, including children's educational achievements and well-being and the cost-  
55  
56 349 effectiveness of the intervention. This broader scope of the effects of HPSF is included in the overall  
57  
58 350 study design and will be investigated by our multi-disciplinary research group [26]. The specific focus in  
59  
60

1  
2  
3 351 the current study enabled us to investigate the effects of HPSF on children's BMI z-score in much more  
4  
5 352 detail.

6  
7 353  
8  
9 354 The second research question investigated whether HPSF has different effects within specific  
10  
11 355 subgroups of children. Effect-modification analyses showed no significant interactions at T1 and T2.  
12  
13 356 However, the big difference in group sizes in the subgroups of, for example, children's weight status,  
14  
15 357 influenced the p-value. Therefore, effect sizes give a better indication. They all showed similar patterns  
16  
17 358 to the overall analyses. These results seem to indicate that no specific subgroups of children were found  
18  
19 359 to benefit more from HPSF, which is promising as often school-based interventions only seem effective  
20  
21 360 for specific subgroups [17, 25]. These results are especially promising when related to health  
22  
23 361 inequalities, because even when interventions are successful in improving children's health, they may  
24  
25 362 still increase health inequalities. This can happen when an intervention is of greater benefit to  
26  
27 363 advantaged groups, e.g., high SES, than to disadvantaged groups, e.g., low SES [38]. Given the results  
28  
29 364 of the effect modification analyses, HPSF can be seen as an example of an intervention that does not  
30  
31 365 seem to increase health inequalities among children. Further research with longer follow-up periods  
32  
33 366 should investigate whether HPSF contributes to reducing the health inequalities.

34 367

### 35 368 **Limitations and strengths**

37 369 The longitudinal quasi-experimental design can be seen as a limitation of this study, since we were  
38  
39 370 unable to (cluster-) randomize schools. However, due to this design, we were able to test the  
40  
41 371 effectiveness in terms of differences in children's BMI z-scores between the three school groups over  
42  
43 372 time, and were also able to enroll schools on the basis of motivation, which reflects the real-life situation  
44  
45 373 of school health promotion. Moreover, participants did not significantly differ from non-responders in the  
46  
47 374 participating schools and other children in the region with regard to health and lifestyle [39]. The lack of  
48  
49 375 randomization could, however, have resulted in confounding bias. Therefore, we controlled for baseline  
50  
51 376 BMI z-score, gender, study year at T0, SES score, and ethnicity in all analyses. The significant  
52  
53 377 differences in children's BMI z-scores at baseline between the three groups could indicate that children  
54  
55 378 in the control schools are less open to change: their habits in unhealthy behaviours are stronger as they  
56  
57 379 have already led to overweight or obesity. On the other hand, this difference, which we controlled for,

1  
2  
3 380 may have resulted in an underestimation of the effect: more room for improvement existed for the  
4  
5 381 children in the control schools compared with the full and partial HPSF.

6  
7 382 Next, HPSF seemed to affect all children in the intervention schools. However, a decrease in  
8  
9 383 BMI z-score might not be favorable for all of them, for example when they already have an extremely  
10  
11 384 low BMI z-score. Therefore, to ensure that the findings reflected the children for whom a decrease in  
12  
13 385 BMI z-score is favorable, we conducted extra sensitivity analyses in which we excluded the children with  
14  
15 386 extremely low BMI z-scores at baseline. These analyses showed comparable results. The high number  
16  
17 387 of children enrolled in the measurements, the low drop-out rate, and the objectively measured BMI were  
18  
19 388 other strengths of this study. There were missing data because some participants did not participate  
20  
21 389 from the start, other participants finished school before the last measurement period in 2017, the  
22  
23 390 parental questionnaire was not completed, respondents skipped questions, or data could not be  
24  
25 391 obtained due to the absence of the child. To deal with the missing data, multiple imputations were used,  
26  
27 392 and a sensitivity analysis, in which only complete cases were included, was conducted. Complete case  
28  
29 393 analysis showed similar results to the original analysis, which increased the reliability of the findings in  
30  
31 394 this study.

32 395

### 33 396 **Conclusions**

35 397 Taking all the results and limitations into account, it can be concluded that HPSF was effective in  
36  
37 398 lowering children's BMI z-scores after one and two years' follow-up and no specific subgroups of children  
38  
39 399 were found to benefit more from the intervention. Even though longer follow-up periods are needed to  
40  
41 400 draw hard conclusions, both versions of the initiative seem promising in offering perspective in the on-  
42  
43 401 going obesity epidemic in young children.

44 402

### 45 403 **Acknowledgements**

47 404 We are grateful to all of the schools, the children and other collaborating partners participating in the  
48  
49 405 project. We thank the PhD students and research assistants for their help in data collection.

50 406

### 51 407 **Competing interests**

52 408 The authors declare that they have no competing interests.

53 409



### 410 **Ethics approval and consent to participate**

411 Ethical approval was given by the Medical Ethics Committee Zuyderland located in Heerlen (MEC 14-  
412 N-142). All participants were required to complete an informed consent form, signed by (both) parents.

413

### 414 **Data sharing**

415 The data that support the findings of this study were collected as part of the 'Healthy Primary School of  
416 the Future' quasi-experimental study. Data collection will take place until 2019 to study the effects after  
417 4 years of exposure. Data on the 4-year effects and potential other comparative studies in the  
418 Netherlands will become available following article publication.

419

### 420 **Funding**

421 This study was funded by the Limburg provincial authorities, Project Number 200130003, by Friesland  
422 Campina, Project Number LLMV00, and by Maastricht University. None of the funding bodies had a role  
423 in the design of the study or the writing of this manuscript, nor in the data collection, analysis,  
424 interpretation of data, and writing of publications.

425

### 426 **Authors' contributions**

427 NB, PvA, SK, HS, MW, OvS, and MJ were part of designing the intervention. NB, MO, MW collected the  
428 data for the manuscript. NB and BW analysed the data. NB drafted and revised the manuscript. PvA,  
429 SK, HS, MO, MW, OvS, BW, and MJ critically reviewed the manuscript during the writing process. All  
430 authors have read and approved the final manuscript.

431

### 432 **Supplementary Information**

433 Supplementary file 1 (doc): A graphical presentation of individual changes in BMI z-scores at one year  
434 (T1) and two years' (T2) follow-up compared with baseline. A table with potential effect-modifiers of the  
435 intervention effects on children's BMI z-score.

436 Supplementary file 2 (pdf): The original protocol for the study. The protocol is also published by  
437 Willeboordse et al. [26].

438

### 439 **License statement**

1  
2  
3 440 The Submitting Author has the right to grant and does grant on behalf of all authors of the Work (as  
4  
5 441 defined in the below author licence), an exclusive licence and/or a non-exclusive licence for contributions  
6  
7 442 from authors who are: i) UK Crown employees; ii) where BMJ has agreed a CC-BY licence shall apply,  
8  
9 443 and/or iii) in accordance with the terms applicable for US Federal Government officers or employees  
10  
11 444 acting as part of their official duties; on a worldwide, perpetual, irrevocable, royalty-free basis to BMJ  
12  
13 445 Publishing Group Ltd ("BMJ") its licensees and where the relevant Journal is co-owned by BMJ to the  
14  
15 446 co-owners of the Journal, to publish the Work in BMJ Open and any other BMJ products and to exploit  
16  
17 447 all rights, as set out in our licence.  
18  
19 448

## 449 **References**

- 22 450 1. Ogden CL, Carroll MD, Flegal KM. Epidemiologic trends in overweight and obesity. *Endocrinology*  
23 451 *and metabolism clinics*. 2003;32(4):741-60.
- 26 452 2. Strauss RS. Childhood obesity and self-esteem. *Pediatrics*. 2000;105(1):e15-e.
- 28 453 3. WHO. Report of the commission on ending childhood obesity: World Health Organization; 2016.
- 30 454 4. WHO. Obesity and overweight 2018 [Available from: [http://www.who.int/en/news-room/fact-](http://www.who.int/en/news-room/fact-sheets/detail/obesity-and-overweight)  
31 455 [sheets/detail/obesity-and-overweight](http://www.who.int/en/news-room/fact-sheets/detail/obesity-and-overweight).
- 34 456 5. Arcaya MC, Arcaya AL, Subramanian S. Inequalities in health: definitions, concepts, and theories.  
35 457 *Global health action*. 2015;8(1):27106.
- 37 458 6. Schönbeck Y, Talma H, van Dommelen P, Bakker B, Buitendijk SE, HiraSing RA, et al. Increase in  
39 459 prevalence of overweight in Dutch children and adolescents: a comparison of nationwide growth studies  
40 460 in 1980, 1997 and 2009. *PloS one*. 2011;6(11):e27608.
- 43 461 7. Marmot M, Allen J, Bell R, Bloomer E, Goldblatt P. WHO European review of social determinants of  
44 462 health and the health divide. *The Lancet*. 2012;380(9846):1011-29.
- 47 463 8. Craigie AM, Lake AA, Kelly SA, Adamson AJ, Mathers JC. Tracking of obesity-related behaviours  
48 464 from childhood to adulthood: a systematic review. *Maturitas*. 2011;70(3):266-84.
- 51 465 9. Han E, Norton EC, Powell LM. Direct and indirect effects of body weight on adult wages. *Economics*  
52 466 *& Human Biology*. 2011;9(4):381-92.
- 55 467 10. Stein D, Weinberger-Litman SL, Latzer Y. Psychosocial perspectives and the issue of prevention in  
56 468 childhood obesity. *Frontiers in public health*. 2014;2.

- 1  
2  
3 469 11.Kelsey MM, Zaepfel A, Bjornstad P, Nadeau KJ. Age-related consequences of childhood obesity.  
4  
5 470 Gerontology. 2014;60(3):222-8.  
6  
7 471 12.Lynch JW, Kaplan GA, Salonen JT. Why do poor people behave poorly? Variation in adult health  
8  
9 472 behaviours and psychosocial characteristics by stages of the socioeconomic lifecourse. Social science  
10  
11 473 & medicine. 1997;44(6):809-19.  
12  
13 474 13.Suhrcke M, de Paz Nieves C. The impact of health and health behaviours on educational outcomes  
14  
15 475 in high-income countries: a review of the evidence: World Health Organization, Regional Office for  
16  
17 476 Europe Copenhagen, Denmark; 2011.  
18  
19 477 14.Dooris M, Poland B, Kolbe L, De Leeuw E, McCall DS, Wharf-Higgins J. Healthy settings. Global  
20  
21 478 perspectives on health promotion effectiveness: Springer; 2007. p. 327-52.  
22  
23 479 15.Langford R, Campbell R, Magnus D, Bonell CP, Murphy SM, Waters E, et al. The WHO Health  
24  
25 480 Promoting School framework for improving the health and well-being of students and staff. Cochrane  
26  
27 481 Database Syst Rev. 2011;1.  
28  
29 482 16.Verrotti A, Penta L, Zenzeri L, Agostinelli S, De Feo P. Childhood obesity: prevention and strategies  
30  
31 483 of intervention. A systematic review of school-based interventions in primary schools. Journal of  
32  
33 484 endocrinological investigation. 2014;37(12):1155-64.  
34  
35 485 17.Cook-Cottone C, Casey CM, Feeley TH, Baran J. A meta-analytic review of obesity prevention in the  
36  
37 486 schools: 1997–2008. Psychology in the Schools. 2009;46(8):695-719.  
38  
39 487 18.Oosterhoff M, Joore M, Ferreira I. The effects of school-based lifestyle interventions on body mass  
40  
41 488 index and blood pressure: a multivariate multilevel meta-analysis of randomized controlled trials. Obesity  
42  
43 489 Reviews. 2016;17(11):1131-53.  
44  
45 490 19.Deschesnes M, Martin C, Hill AJ. Comprehensive approaches to school health promotion: how to  
46  
47 491 achieve broader implementation? Health Promot Int. 2003;18(4):387-96.  
48  
49 492 20.Darlington EJ, Violon N, Jourdan D. Implementation of health promotion programmes in schools: an  
50  
51 493 approach to understand the influence of contextual factors on the process? BMC Public Health.  
52  
53 494 2018;18(1):163.  
54  
55 495 21.Keshavarz N, Nutbeam D, Rowling L, Khavarpour F. Schools as social complex adaptive systems:  
56  
57 496 a new way to understand the challenges of introducing the health promoting schools concept. Soc Sci  
58  
59 497 Med. 2010;70(10):1467-74.  
60

- 1  
2  
3 498 22. Moore GF, Audrey S, Barker M, Bond L, Bonell C, Hardeman W, et al. Process evaluation of complex  
4  
5 499 interventions: Medical Research Council guidance. *BMJ*. 2015;350:h1258.  
6  
7 500 23. Hawe P, Shiell A, Riley T. Theorising interventions as events in systems. *Am J Commun Psychol*.  
8  
9 501 2009;43(3-4):267-76.  
10  
11 502 24. Mason M. What is complexity theory and what are its implications for educational change? *Educ*  
12  
13 503 *Philos Theory*. 2008;40(1):35-49.  
14  
15 504 25. Stewart-Brown S. What is the Evidence on School Health Promotion in Improving Health  
16  
17 505 Orpreventing Disease And, Specifically, what is the Effectiveness of the Health Promoting Schools  
18  
19 506 Approach?: World Health Organization; 2006.  
20  
21 507 26. Willeboordse M, Jansen M, van den Heijkant S, Simons A, Winkens B, de Groot R, et al. The Healthy  
22  
23 508 Primary School of the Future: study protocol of a quasi-experimental study. *BMC Public Health*.  
24  
25 509 2016;16(1):1.  
26  
27 510 27. Bartelink NH, van Assema P, Jansen MW, Savelberg HH, Willeboordse M, Kremers SP. The Healthy  
28  
29 511 Primary School of the Future: A Contextual Action-Oriented Research Approach. *International Journal*  
30  
31 512 *of Environmental Research and Public Health*. 2018;15(10):2243.  
32  
33 513 28. Young I, St Leger L, Buijs G. School health promotion: evidence for effective action. Background  
34  
35 514 paper SHE factsheet. 2013;2.  
36  
37 515 29. Gezondheidsraad. Dutch Dietary Guidelines 2015. The Hague, The Netherlands: Health Council of  
38  
39 516 the Netherlands; 2015.  
40  
41 517 30. Bartelink NH, van Assema P, Jansen MW, Savelberg HH, Moore GF, Hawkins J, et al. Process  
42  
43 518 evaluation of the Healthy Primary School of the Future: The key learning points. Submitted.  
44  
45 519 31. Vermeer AJM BN, Hesdahl MH, Janssen-Goffin MJH, Linssen ECAJ, Rutten N, Hajema KJ. Lokale  
46  
47 520 rapporten Volksgezondheid Toekomst Verkenning: Een nieuwe kijk op gezondheid in Heerlen,  
48  
49 521 Kerkrade, Landgraaf en Brunssum; [Local reports on Public Health Development: A new perspective on  
50  
51 522 health in Heerlen, Kerkrade, Landgraaf and Brunssum]. Geleen: GGD Zuid Limburg; 2014.  
52  
53 523 32. Shavers VL. Measurement of socioeconomic status in health disparities research. *Journal of the*  
54  
55 524 *national medical association*. 2007;99(9):1013.  
56  
57 525 33. Keij I. Hoe doet het CBS dat nou? Standaarddefinitie allochtonen [How does CBS work? Standard  
58  
59 526 definition immigrants]. *Index: Feiten en Cijfers over onze Samenleving*. 2000;10:24-5.  
60

- 1  
2  
3 527 34.Cole TJ, Bellizzi MC, Flegal KM, Dietz WH. Establishing a standard definition for child overweight  
4  
5 528 and obesity worldwide: international survey. *Bmj*. 2000;320(7244):1240.  
6  
7 529 35.Volksgezondheidszorg.info. Overgewicht kinderen [Overweight children] 2017 [Available from:  
8  
9 530 12  
13 532 overgewicht-kinderen">overgewicht-kinderen.  
14  
15 533 36.Lipsey MW. Design sensitivity: Statistical power for experimental research: Sage; 1990.  
16  
17 534 37.Lister-Sharp D, Chapman S, Stewart-Brown S, Sowden A. Health promoting schools and health  
18  
19 535 promotion in schools: two systematic reviews. 1999.  
20  
21 536 38.Lorenc T, Petticrew M, Welch V, Tugwell P. What types of interventions generate inequalities?  
22  
23 537 Evidence from systematic reviews. *J Epidemiol Community Health*. 2013;67(2):190-3.  
24  
25 538 39.Boudewijns E, Pepels JJS, Van Kann D, Konings K, van Schayck CP, Willeboordse M. Healthy,  
26  
27 539 happy, and rich? A cross-sectional assessment of nonresponse and external validity in a school-based  
28  
29  
30  
31  
32  
33  
34  
35  
36  
37  
38  
39  
40  
41  
42  
43  
44  
45  
46  
47  
48  
49  
50  
51  
52  
53  
54  
55  
56  
57  
58  
59  
60

541 **Figure 1. Flowchart**

542  
543 \* Reasons for drop-out T1: switched to other included school (n=2), other reasons, e.g., moved away or actively  
544 stopped participation (n=62).

545 \*\* Reasons for drop-out T2: finished school (n=228), switched to other included school (n=17), other reasons e.g.  
546 moved away or actively stopped participation (n=45).

547 \*\*\*Selection for effect study: at baseline (T0) children from study year one to seven, at T1 children from study year  
548 two to eight, and at T2 children from study year three to eight.

549

550 **Table 1. Characteristics of study sample at baseline (T0)**

|                         | Total          |                | Full HPSF |                | Partial HPSF |                | Control |                | Chi-square / F-value | p-value     |
|-------------------------|----------------|----------------|-----------|----------------|--------------|----------------|---------|----------------|----------------------|-------------|
|                         | N <sup>a</sup> | Mean (±SD) % / | N         | Mean (±SD) % / | N            | Mean (±SD) % / | N       | Mean (±SD) % / |                      |             |
| Gender (% boys)         | 1676           | 47.4%          | 537       | 47.7%          | 478          | 47.3%          | 661     | 47.2%          | .029 <sup>c</sup>    | .986        |
| Age (years)             | 1676           | 7.5 (±2.16)    | 537       | 7.6 (±2.16)    | 478          | 7.4 (±2.22)    | 661     | 7.6 (±2.13)    | 1.610                | .200        |
| Study year <sup>b</sup> | 1676           | 4.0 (±2.00)    | 537       | 4.0 (±2.00)    | 478          | 3.8 (±2.01)    | 661     | 4.1 (±1.99)    | 2.526                | .080        |
| Ethnicity (% Western)   | 1016           | 94.1%          | 341       | 93.0%          | 326          | 96.0%          | 349     | 93.4%          | 3.239 <sup>c</sup>   | .198        |
| SES                     |                |                |           |                |              |                |         |                |                      |             |
| Lowest tertile          | 1117           | 32.6%          | 361       | 28.8%          | 365          | 32.3%          | 391     | 36.3%          | 5.636 <sup>c</sup>   | .228        |
| Middle tertile          |                | 34.0%          |           | 35.7%          |              | 35.6%          |         | 30.9%          |                      |             |
| Highest tertile         |                | 33.4%          |           | 35.5%          |              | 32.1%          |         | 32.7%          |                      |             |
| BMI z-score             | 1109           | .135 (±1.02)   | 321       | .051 (±1.01)   | 352          | .092 (±.95)    | 436     | .232 (±1.07)   | 3.399                | <b>.034</b> |
| Overweight/ obese (%)   | 1109           | 19.9%          | 321       | 16.5%          | 352          | 17.9%          | 436     | 24.1%          | 14.156 <sup>b</sup>  | <b>.006</b> |

551 <sup>a</sup> Observed N, missing data was due to later participation in the study, incomplete parent questionnaire, or because  
552 no height/weight was measured in study year 1.

553 <sup>b</sup> Study year 1-8 in Dutch system is comparable to two years of kindergarten followed by grade 1-6.

554 <sup>c</sup> Chi-square test.

555 Bold p-value = significant (<.05) difference

556 Abbreviations: SD = standard deviation; C.I. = confidence interval; ES = Effect size.

561 **Figure 2. Observed change in children's BMI z-score at one year and two years' follow-up compared with baseline**

566 **Table 2. One- and two-year estimated intervention effects on children's BMI z-score<sup>a</sup>**

|             |    | Full HPSF vs. control  |            |      | Partial HPSF vs. control |            |      | Full HPSF vs. Partial HPSF |     |      |
|-------------|----|------------------------|------------|------|--------------------------|------------|------|----------------------------|-----|------|
|             |    | B (95% C.I.)           | p          | ES   | B (95% C.I.)             | p          | ES   | B (95% C.I.)               | p   | ES   |
| BMI z-score | T1 | -0.038 (-0.09 - 0.01)  | .15        | -.04 | -0.051 (-0.10 - -0.01)   | <b>.03</b> | -.05 | 0.013 (-0.04 - 0.06)       | .62 | .01  |
|             | T2 | -0.083 (-0.15 - -0.02) | <b>.01</b> | -.08 | -0.066 (-0.13 - 0.00)    | <b>.05</b> | -.07 | -0.017 (-0.09 - 0.05)      | .63 | -.02 |

567 <sup>a</sup> Adjusted for baseline, gender, study year at T0, SES, and ethnicity.

568 Bold p-value = significant (<.05) difference

569 Abbreviations: C.I. = confidence interval; ES = Effect size.

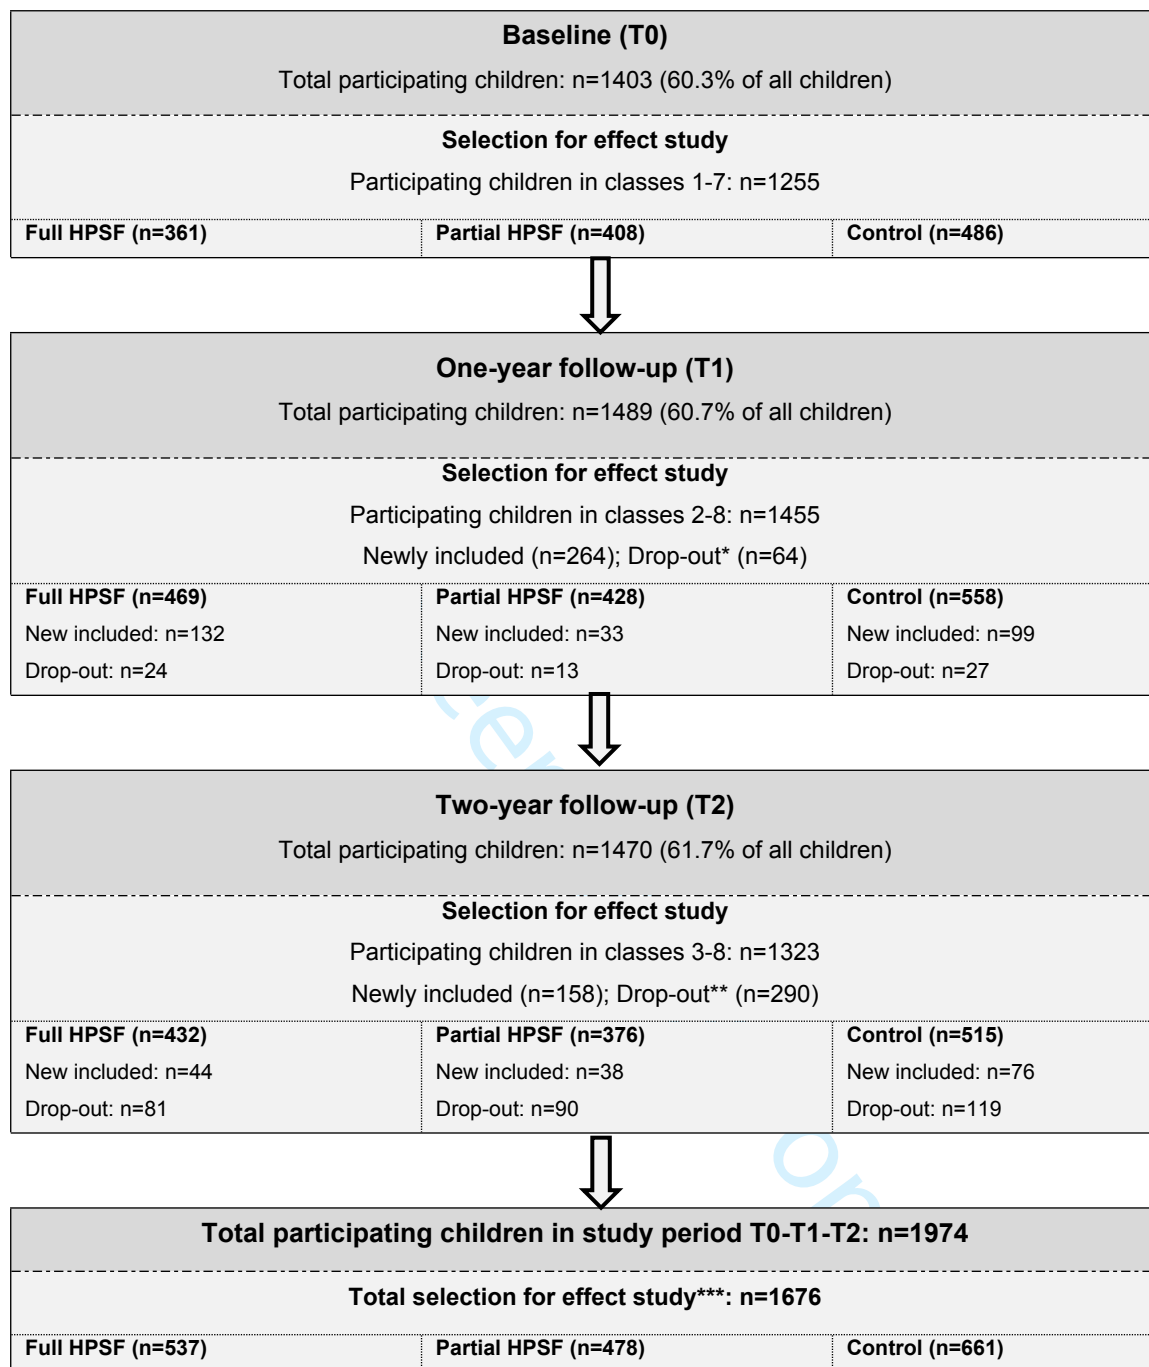

Figure 1. Flowchart

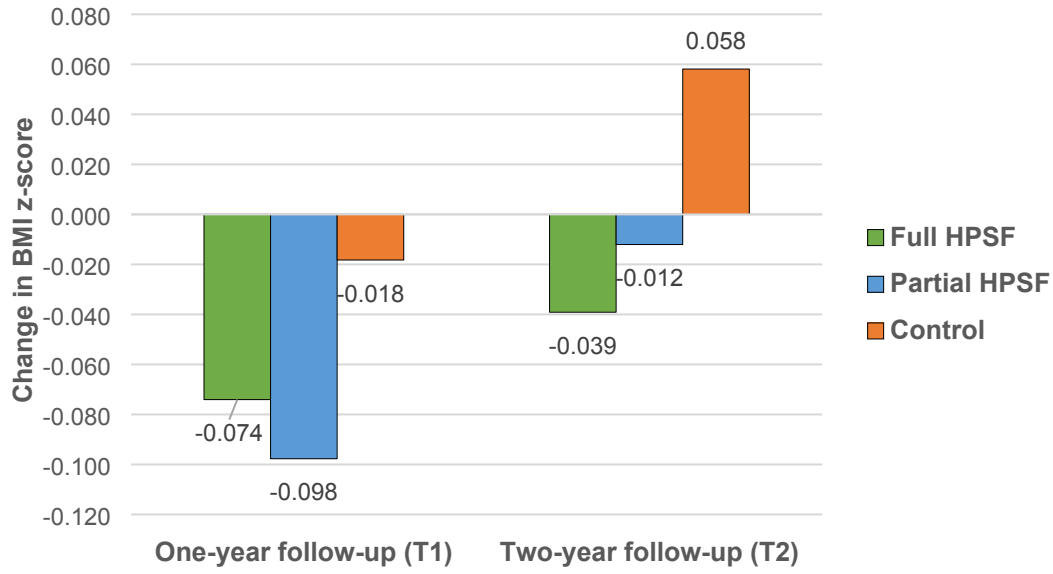

Figure 2. Observed change in children’s BMI z-score at one year and two years’ follow-up compared with baseline

peer review only



Supplementary file 1

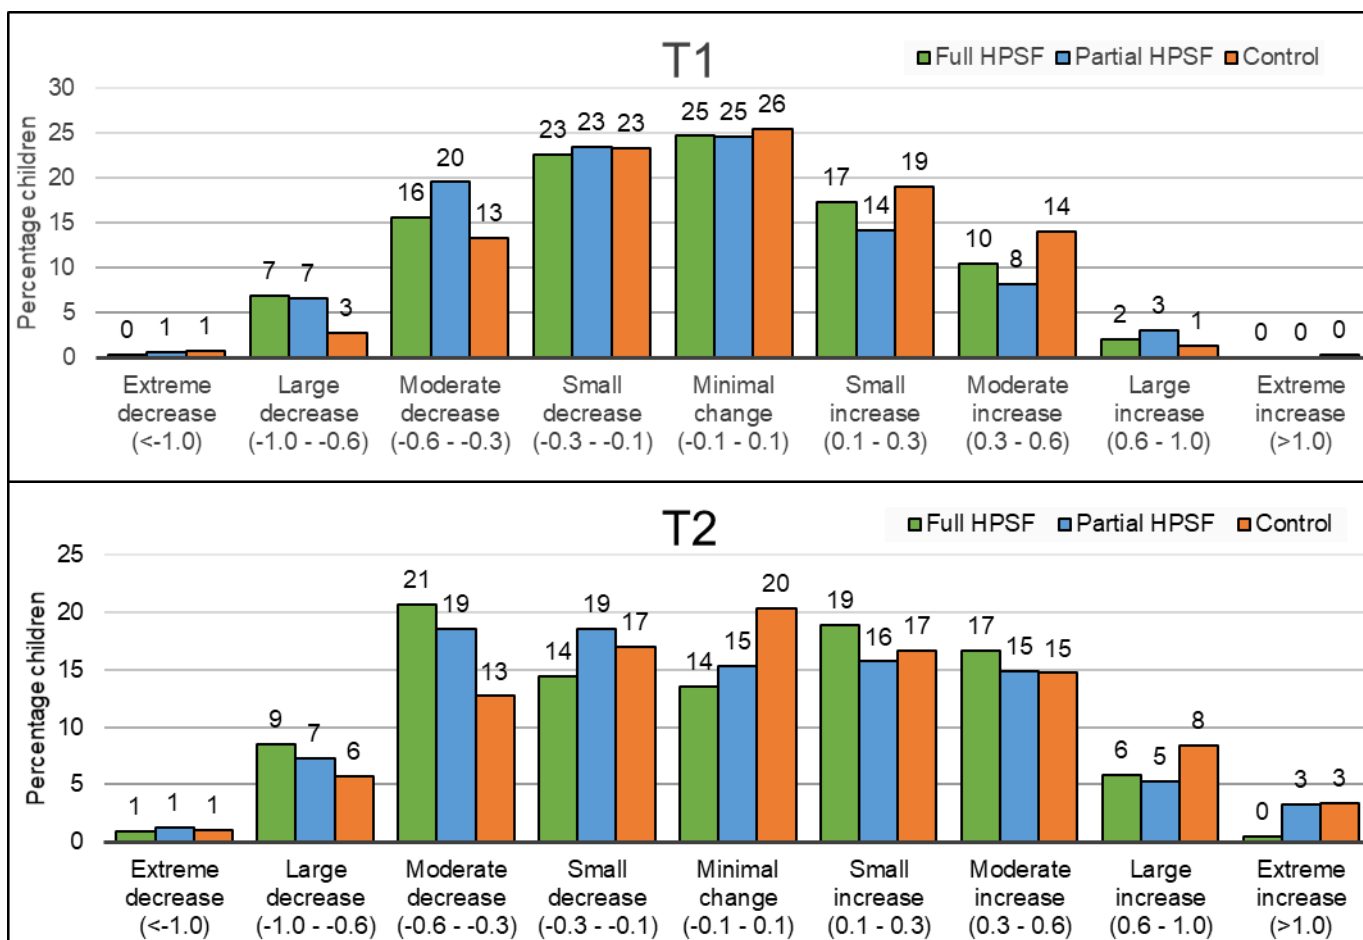

Figure S1. Graphical presentation of individual changes in BMI z-scores at one year (T1) and two years' (T2) follow-up compared with baseline

8  
9 **Table S1. Potential effect-modifiers of the intervention effects on children’s BMI z-score <sup>a</sup>**

|                                      | N <sup>b</sup> | Full HPSF vs. control  |                |      | Partial HPSF vs. control |      |      | Full HPSF vs. Partial HPSF |      |      |
|--------------------------------------|----------------|------------------------|----------------|------|--------------------------|------|------|----------------------------|------|------|
|                                      |                | B (95% C.I.)           | p              | ES   | B (95% C.I.)             | p    | ES   | B (95% C.I.)               | p    | ES   |
| <b>AFTER ONE-YEAR FOLLOW-UP (T1)</b> |                |                        |                |      |                          |      |      |                            |      |      |
| <b>Gender</b>                        |                |                        |                |      |                          |      |      |                            |      |      |
| Interaction-term                     |                |                        | .73            |      |                          | .70  |      |                            | .47  |      |
| Boys                                 | 794            | -0.046 (-0.11 - 0.02)  | .18            | -.05 | -0.041 (-0.11 - 0.03)    | .22  | -.04 | -0.005 (-0.08 - 0.07)      | .89  | -.01 |
| Girls                                | 882            | -0.030 (-0.10 - 0.04)  | .38            | -.03 | -0.060 (-0.12 - 0.00)    | .07  | -.06 | 0.029 (-0.04 - 0.10)       | .39  | .03  |
| <b>Study year</b>                    |                |                        |                |      |                          |      |      |                            |      |      |
| Interaction-term                     |                |                        | .60            |      |                          | .63  |      |                            | .98  |      |
| 1-4                                  | 970            | -0.027 (-0.09 - 0.04)  | .43            | -.03 | -0.039 (-0.10 - 0.02)    | .23  | -.04 | 0.011 (-0.05 - 0.08)       | .73  | .01  |
| 165-8                                | 706            | -0.052 (-0.12 - 0.02)  | .15            | -.05 | -0.062 (-0.13 - 0.01)    | .07  | -.06 | 0.010 (-0.07 - 0.09)       | .79  | .01  |
| <b>SES</b>                           |                |                        |                |      |                          |      |      |                            |      |      |
| Interaction-term <sup>c</sup>        |                |                        | ≥.35           |      |                          | ≥.71 |      |                            | ≥.42 |      |
| Low                                  | 364            | -0.058 (-0.15 - 0.03)  | .19            | -.06 | -0.056 (-0.14 - 0.03)    | .19  | -.06 | -0.002 (-0.10 - 0.10)      | .96  | .00  |
| Middle                               | 380            | -0.005 (-0.09 - 0.08)  | .91            | .00  | -0.050 (-0.13 - 0.03)    | .24  | -.05 | 0.046 (-0.04 - 0.13)       | .29  | .05  |
| High                                 | 373            | -0.036 (-0.12 - 0.05)  | .39            | -.04 | -0.034 (-0.12 - 0.05)    | .42  | -.03 | -0.003 (-0.09 - 0.08)      | .95  | .00  |
| <b>Weight status at baseline</b>     |                |                        |                |      |                          |      |      |                            |      |      |
| Interaction-term                     |                |                        | .90            |      |                          | .32  |      |                            | .30  |      |
| Non-overweight                       | 888            | -0.039 (-0.10 - 0.02)  | .17            | -.05 | -0.039 (-0.09 - 0.01)    | .12  | -.05 | 0.000 (-0.06 - 0.06)       | .99  | .00  |
| Overweight                           | 221            | -0.032 (-0.14 - 0.08)  | .58            | -.04 | -0.100 (-0.21 - 0.01)    | .07  | -.14 | 0.069 (-0.05 - 0.18)       | .24  | .09  |
| <b>AFTER TWO-YEAR FOLLOW-UP (T2)</b> |                |                        |                |      |                          |      |      |                            |      |      |
| <b>Gender</b>                        |                |                        |                |      |                          |      |      |                            |      |      |
| Interaction-term                     |                |                        | .57            |      |                          | .94  |      |                            | .54  |      |
| Boys                                 | 794            | -0.101 (-0.19 - -0.01) | .03            | -.10 | -0.063 (-0.15 - 0.03)    | .18  | -.06 | -0.038 (-0.13 - 0.06)      | .43  | -.04 |
| Girls                                | 882            | -0.066 (-0.15 - 0.02)  | .13            | -.07 | -0.068 (-0.16 - 0.02)    | .13  | -.07 | 0.002 (-0.09 - 0.10)       | .97  | .00  |
| <b>Study year</b>                    |                |                        |                |      |                          |      |      |                            |      |      |
| Interaction-term                     |                |                        | .18            |      |                          | .75  |      |                            | .33  |      |
| 1-4                                  | 970            | -0.046 (-0.13 - 0.04)  | .29            | -.05 | -0.052 (-0.13 - 0.03)    | .21  | -.05 | 0.006 (-0.08 - 0.09)       | .89  | .01  |
| 5-8                                  | 706            | -0.130 (-0.23 - -0.03) | <b>&lt;.01</b> | -.13 | -0.072 (-0.17 - 0.03)    | .16  | -.07 | -0.058 (-0.16 - 0.05)      | .27  | -.06 |
| <b>SES</b>                           |                |                        |                |      |                          |      |      |                            |      |      |
| Interaction-term <sup>c</sup>        |                |                        | ≥.52           |      |                          | ≥.85 |      |                            | ≥.64 |      |
| Low                                  | 364            | -0.103 (-0.22 - 0.02)  | .10            | -.10 | -0.067 (-0.18 - 0.05)    | .24  | -.07 | -0.036 (-0.16 - 0.09)      | .58  | -.04 |
| Middle                               | 380            | -0.049 (-0.16 - 0.06)  | .39            | -.05 | -0.056 (-0.18 - 0.06)    | .35  | -.06 | 0.007 (-0.11 - 0.13)       | .91  | .01  |
| High                                 | 373            | -0.063 (-0.18 - 0.05)  | .28            | -.06 | -0.051 (-0.16 - 0.06)    | .38  | -.05 | -0.012 (-0.12 - 0.10)      | .84  | -.01 |
| <b>Weight status at baseline</b>     |                |                        |                |      |                          |      |      |                            |      |      |
| Interaction-term                     |                |                        | .82            |      |                          | .92  |      |                            | .90  |      |
| Non-overweight                       | 888            | -0.088 (-0.16 - -0.02) | .02            | -.12 | -0.069 (-0.14 - 0.00)    | .06  | -.09 | -0.019 (-0.09 - 0.06)      | .61  | -.03 |
| Overweight                           | 221            | -0.069 (-0.22 - -0.08) | .36            | -.09 | -0.061 (-0.20 - 0.08)    | .40  | -.08 | -0.008 (-0.17 - 0.15)      | .92  | -.01 |

<sup>a</sup> Adjusted for baseline, gender, study year at T0, SES, and ethnicity.

<sup>b</sup> Observed N per subgroup. Missing data were due to later participation in the study, incomplete parent questionnaire, no measurement of height/weight, or drop-out during the study.

<sup>c</sup> Pair-wise comparisons:

T1, Full HPSF vs. Control: low vs. middle (p=.35), low vs. high (p=.71), middle vs. high (p=.58).

T1, Partial HPSF vs. Control: low vs. middle (p=.93), low vs. high (p=.71), middle vs. high (p=.79).

T1, Full HPSF vs. Partial HPSF: low vs. middle (p=.48), low vs. high (p=1.00), middle vs. high (p=.42).

T2, Full HPSF vs. Control: low vs. middle (p=.52), low vs. high (p=.64), middle vs. high (p=.87).

T2, Partial HPSF vs. Control: low vs. middle (p=.90), low vs. high (p=.85), middle vs. high (p=.95).

T2, Full HPSF vs. Partial HPSF: low vs. middle (p=.64), low vs. high (p=.78), middle vs. high (p=.81).

Bold p-value = significant difference (interaction term: p ≤.10; subgroups: p ≤.05)

Abbreviations: C.I. = Confidence Interval; ES = Effect Size; p = p-value; SES = Socio-Economic Status.

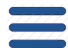

Trial record 1 of 1 for: Saved Studies

Previous Study | [Return to List](#) | Next Study

### The Healthy Elementary School of the Future (THESF)

The safety and scientific validity of this study is the responsibility of the study sponsor and investigators.

▲ Listing a study does not mean it has been evaluated by the U.S. Federal Government. Read our [disclaimer](#) for details.

ClinicalTrials.gov Identifier:

NCT02800616

[Recruitment Status](#) ⓘ : Enrolling by invitation

[First Posted](#) ⓘ : June 15, 2016

[Last Update Posted](#) ⓘ : June 15, 2016

**Sponsor:**

Maastricht University

**Information provided by (Responsible Party):**

Maastricht University

[Study Details](#)

[Tabular View](#)

[No Results Posted](#)

[Disclaimer](#)

[How to Read a Study Record](#)

### Study Description

Go to

**Brief Summary:**

Unhealthy lifestyles in early childhood are a major global health challenge. These lifestyles often persist from generation to generation and contribute to a vicious cycle of health-related and social problems. We present a study protocol that examines the effectiveness of two novel, integrated healthy school interventions. One is a full intervention called 'The Healthy Primary School of the Future', the other is a partial intervention called 'The Physical Activity School'. These intervention approaches will be compared with the regular school approach that is currently common practice in the Netherlands. The main outcome measure will be changes in children's body mass index (BMI). In addition, lifestyle behaviours, academic achievement, child well-being, socio-economic differences, and societal costs will be examined.

| <a href="#">Condition or disease</a> ⓘ                                                                                                     | <a href="#">Intervention/treatment</a> ⓘ | <a href="#">Phase</a> ⓘ |
|--------------------------------------------------------------------------------------------------------------------------------------------|------------------------------------------|-------------------------|
| For peer review only - <a href="http://bmjopen.bmj.com/site/about/guidelines.xhtml">http://bmjopen.bmj.com/site/about/guidelines.xhtml</a> |                                          |                         |

|                   |                                          |                |
|-------------------|------------------------------------------|----------------|
| Overweight        | Other: The Healthy Primary School of the | Not Applicable |
| Physical Activity | Future                                   |                |
| Malnutrition      | Behavioral: The Physical Activity School |                |
| Child Development |                                          |                |
| Lifestyle-related |                                          |                |
| Condition         |                                          |                |
| Socioeconomic     |                                          |                |
| Difficulty        |                                          |                |

#### Detailed Description:

In close collaboration with various stakeholders, a quasi-experimental study was developed, for which children of four intervention schools (n = 1200) in the southern part of the Netherlands are compared with children of four control schools (n = 1200) in the same region. The interventions started in November 2015. In two of the four intervention schools, a whole-school approach named 'The Healthy Primary School of the Future', is implemented with the aim of improving physical activity and dietary behaviour. For this intervention, pupils are offered an extended curriculum, including a healthy lunch, more physical exercises, and social and educational activities, next to the regular school curriculum. In the two other intervention schools, a physical-activity school approach called 'The Physical Activity School', is implemented, which is essentially similar to the other intervention, except that no lunch is provided.

We hypothesize that these healthy school interventions will result in normalized BMI distributions that are more in line with national and international standards (smaller standard deviations) among primary school children, with a more pronounced effect in the full intervention schools (due to the expected synergy between exercise and diet) than in the partial intervention schools. Also, our multi-disciplinary research group will study a wide range of outcome measures, including lifestyle behaviours, academic achievement, child well-being, socio-economic differences, and societal costs. Moreover, an evaluation will be performed of the legal consequences of a healthy school approach in the Netherlands, as well as the conflicting interests of the stakeholders. Data collection is conducted within the school system. The interventions proceed during a period of four years. The baseline measurements started in September 2015 and yearly follow-up measurements are taking place until 2019.

Our primary research question is: What is the effect of the full intervention ('The Healthy Primary School of the Future') on the BMI of primary school children compared to no intervention (control schools)? Our secondary research question is: What is the effect of the full intervention on the BMI of primary school children compared to the partial intervention ('The Physical Activity School')? Our tertiary research questions are: (1) What is the effect of the full intervention in comparison with the partial intervention and the regular school approach (control schools) on: (a) children's levels of physical activity and sedentary behaviour, nutritional knowledge, healthy food preferences and behaviour, cognitive and non-cognitive performance, HR-QoL, socio-emotional development, and sick leave? (b) parenting and teacher practices regarding physical activity and nutrition? (c) parental HR-QoL, well-being, labour participation and sick leave? (d) benefits across different socio-economic

For peer review only - <http://bmjopen.bmj.com/site/about/guidelines.xhtml>

backgrounds? (e) long and short term cost-effectiveness? (f) satisfaction among the involved stakeholders (children, parents, teachers, and child care partners)? (2) Which determinants influence the quality of the implementation of the intervention? (3) What is the scope of children's human rights to health, what is the legal role of primary schools in realizing these rights (e.g., obligations and responsibilities of state and non-state actors, conflicts of interests and legal solutions to these conflicts), and is the intervention feasible within Dutch educational law?

A whole-school approach is a new concept in the Netherlands. Due to its innovative, multifaceted nature and sound scientific foundation, these integrated programmes have the potential to form a template for primary schools worldwide. The effects of this approach may extend further than the outcomes associated with well-being and academic achievement, potentially impacting legal and cultural aspects in our society.

## Study Design

Go to

[Study Type](#) ⓘ : Interventional (Clinical Trial)

Estimated [Enrollment](#) ⓘ : 1800 participants

Allocation: Non-Randomized

Intervention Model: Factorial Assignment

Masking: None (Open Label)

Primary Purpose: Prevention

Official Title: The Healthy Elementary School of the Future

[Study Start Date](#) ⓘ : September 2015

Estimated [Primary Completion Date](#) ⓘ : November 2020

Estimated [Study Completion Date](#) ⓘ : November 2020

## Arms and Interventions

Go to

| <a href="#">Arm</a> ⓘ                                                                                                                                                                                                                                                                                                                  | <a href="#">Intervention/treatment</a> ⓘ                                                                                                                                                                                                                                                                                                                                                                                                                               |
|----------------------------------------------------------------------------------------------------------------------------------------------------------------------------------------------------------------------------------------------------------------------------------------------------------------------------------------|------------------------------------------------------------------------------------------------------------------------------------------------------------------------------------------------------------------------------------------------------------------------------------------------------------------------------------------------------------------------------------------------------------------------------------------------------------------------|
| <p>Experimental: Full intervention group</p> <p>The full intervention ('The Healthy Primary School of the Future') is implemented in two schools involving extended school hours in which healthy nutrition, physical exercise, environmental, social, and educational activities are incorporated, during a period of four years.</p> | <p>Other: The Healthy Primary School of the Future</p> <p>In two out of four intervention schools, a whole-school approach named 'The Healthy Primary School of the Future', is implemented with the aim of improving physical activity and dietary behaviour. For this intervention, pupils are offered an extended curriculum, including a healthy lunch, more physical exercises, and social and educational activities, next to the regular school curriculum.</p> |
| <p>Experimental: Partial intervention group</p>                                                                                                                                                                                                                                                                                        | <p>Behavioral: The Physical Activity School</p>                                                                                                                                                                                                                                                                                                                                                                                                                        |

For peer review only - <http://bmjopen.bmj.com/site/about/guidelines.xhtml>

|                                                                                                                                                                                                                                                                                                                                                                                                                                                                             |                                                                                                                                                                                                                                    |
|-----------------------------------------------------------------------------------------------------------------------------------------------------------------------------------------------------------------------------------------------------------------------------------------------------------------------------------------------------------------------------------------------------------------------------------------------------------------------------|------------------------------------------------------------------------------------------------------------------------------------------------------------------------------------------------------------------------------------|
| <p>The partial intervention ('The Physical Activity School') is implemented in two other schools: involving extended school hours in which healthy nutrition, physical exercise, environmental, social, and educational activities are incorporated, during a period of four years. Hence, this intervention only differs from the full intervention on the absence of nutritional intervention. Instead, children bring their own food from home, as they normally do.</p> | <p>In the two other intervention schools, a physical-activity school approach called 'The Physical Activity School', is implemented, which is essentially similar to the other intervention, except that no lunch is provided.</p> |
| <p>No Intervention: Control group</p> <p>Four primary schools will function as control schools. The control schools have a representative Dutch school environment in terms of lifestyle education, school hours and amount of Physical Education (PE) lessons.</p>                                                                                                                                                                                                         |                                                                                                                                                                                                                                    |

## Outcome Measures

Go to

### Primary Outcome Measures

1. Child absolute change in BMI Z-score, based on weight and height. [ Time Frame: Four years ]

Weight is measured using a weighing scale, to the nearest 0.1 kg; height is measured using a measuring rod, to the nearest 0.1 cm.

### Secondary Outcome Measures

1. Child hip and waist circumferences [ Time Frame: Four years ]

Using a measuring tape, to the nearest 0.1 cm, following the World Health Organization's assessment protocol

2. Child handgrip strength [ Time Frame: Four years ]

Measured using a calibrated Jamar hydraulic hand dynamometer to the nearest 0.5 kg

3. Child disease status since birth, hospital admissions (number and duration), healthcare visits (number), and medication use in the previous twelve months [ Time Frame: Four years ]

Self-report measure (online parental questionnaire)

1  
2  
3  
4  
5  
6  
7  
8  
9  
10  
11  
12  
13  
14  
15  
16  
17  
18  
19  
20  
21  
22  
23  
24  
25  
26  
27  
28  
29  
30  
31  
32  
33  
34  
35  
36  
37  
38  
39  
40  
41  
42  
43  
44  
45  
46  
47  
48  
49  
50  
51  
52  
53  
54  
55  
56  
57  
58  
59  
60

4. Child pre-school blood pressure (data obtained between the ages of 4 to 6), birth weight, and information on disease history. [ Time Frame: Obtained once ]

Data previously obtained by the regional Public Health Services.

5. Parental BMI is assessed by self-reported height and weight of both parents/caregivers [ Time Frame: Four years ]

Self-report measure (online parental questionnaire).

6. Parental practices regarding nutrition using the shortened version (nine items) of the Comprehensive Snack Parenting Questionnaire (CSPQ) [ Time Frame: Four years ]

Self-report measure (online parental questionnaire).

7. Parental practices regarding physical activity are assessed with a questionnaire developed in the same style as the Comprehensive Snack Parenting Questionnaire (CSPQ) [ Time Frame: Four Years ]

Self-report measure (online parental questionnaire).

8. Labour participation of parents is assessed by current employment status (self-report measure). [ Time Frame: Four years ]

Current employment status is combined with parental education level and household income to determine SES.

9. Parents' ethnicity and level of (material) deprivation [ Time Frame: Four years ]

Self-report measure (online parental questionnaire).

10. Parental sick leave and absence from work or education because of illness of their child. [ Time Frame: Four years ]

Self-report measure (online parental questionnaire). Labour participation is combined with parental sick leave rates to determine productivity losses from work.

11. Child health-related quality of life [ Time Frame: Four years ]

Examined with the validated EuroQol 5-Dimensions Youth version questionnaire (EQ-5D-Y) and the proxy version for parents. Child-specific HR-QoL is measured by the validated Paediatric Quality of Life Inventory (PedsQL) and parents complete the proxy version of this questionnaire.

12. Child psychological attributes (emotional symptoms, conduct problems, hyperactivity/inattention, peer relationship problems and prosocial behaviour) [ Time Frame: Four years ]

For peer review only - <http://bmjopen.bmj.com/site/about/guidelines.xhtml>

Assessed using the Strength and Difficulties Questionnaire.

1  
2  
3 13. Child social, emotional, and academic self-efficacy. [ Time Frame: Four years ]  
4

5 Tested using the Self-Efficacy Questionnaire for Children (SEQ-C).  
6  
7

8  
9 14. Child self-confidence, social skills, self-efficacy, school well-being, future expectations, and  
10 social support [ Time Frame: Four years ]  
11

12 Assessed with OnderwijsMonitor Limburg programme  
13  
14

15 15. Child physical activity and sedentary behavior assessed using the Actigraph accelerometer  
16 [ Time Frame: Four years ]  
17

18 In the week in which the child is wearing the accelerometer, parents fill in a short activity  
19 diary on their child's physical activity and swimming behaviour and exceptional  
20 circumstances (e.g., illness of the child)  
21  
22  
23  
24

25 16. Sports club membership, active forms of transport to school, and leisure time physical  
26 activities (e.g., children's activities in weekends: watching TV, music or theatre, playing  
27 outdoors, practicing sports etc.) assessed in both children and parents. [ Time Frame: Four  
28 years ]  
29  
30

31 Self-report measure  
32  
33  
34

35 17. Child food intake [ Time Frame: Four years ]  
36

37 Assessed using a food frequency questionnaire and a dietary recall tool to be completed by  
38 both children and parents.  
39  
40  
41

42 18. Child food preferences and familiarity with healthy food products. [ Time Frame: Four years ]  
43

44 Self-report measure: The questions mainly consist of pictures of food items, for which  
45 children can indicate whether they have ever eaten these items and whether they like them  
46 or not.  
47  
48  
49

50 19. Parental practices regarding nutrition and physical activity [ Time Frame: Four years ]  
51

52 Self-report measure  
53  
54

55 20. Parental wellbeing [ Time Frame: Four years ]  
56

57 measured by the Satisfaction With Life Survey (SWLS)  
58  
59  
60

21. Parental health-related quality of life [ Time Frame: Four years ]

Measured with the EuroQol - 5-Dimensions Questionnaire (EQ-5D)

For peer review only - <http://bmjopen.bmj.com/site/about/guidelines.xhtml>



1 22. Socioeconomic status [ Time Frame: Four years ]

3 Self-report measure

4  
5  
6  
7 23. School/ teacher practices regarding nutrition and physical activity [ Time Frame: Four years ]

8 E.g. modelling eating healthy food products and encouraging children's physical activity.

9 Measured using adapted version of the Parental Practices Instrument

10  
11  
12  
13  
14 24. Teacher's self-reported height, weight and transport forms to work [ Time Frame: Four years ]

15 Written questionnaire

16  
17  
18  
19 25. Child academic achievements [ Time Frame: Four years ]

20 Monitored using the Dutch national test called Centrale Eindtoets Basisonderwijs (CITO),  
21 and various other tests used by the schools. The CITO test measures language, maths and  
22 world orientation. In addition to the CITO test, many schools use a wide range of tests  
23 throughout the children's school careers. This also includes tests on maths (taken twice a  
24 year) and various aspects of language such as decoding skills, spelling, vocabulary, and  
25 reading comprehension.  
26  
27  
28  
29

30  
31  
32 26. School advice and the actual level of secondary school opted for (Dutch secondary education  
33 is hierarchically ordered). [ Time Frame: Four years ]

34 School registration system

35  
36  
37  
38  
39 27. School absenteeism and repeating classes [ Time Frame: Four years ]

40 School registration system

41  
42  
43  
44 28. Process evaluation using a school satisfaction questionnaire [ Time Frame: Four years ]

45 Self-report measure: general parental satisfaction with their children's school (including  
46 safety, communication, quality of education, challenges to children, and professionalism of  
47 teachers). Implementation of the intervention is evaluated by qualitative outcome measures  
48 such as interviews with parents and children, and classroom observations.  
49  
50  
51  
52

53  
54 29. Juridical evaluation through literature study and interviews [ Time Frame: Four years ]

55 Legal aspects will be addressed by a thorough scientific literature study and examination of  
56 policy and legislation instruments and case-law on the scope of children's right to health.  
57 Interviews with the parties involved in the healthy school setting will determine the juridical-  
58 related interests and possibilities.  
59  
60

## Eligibility Criteria

Go to 

### Information from the National Library of Medicine

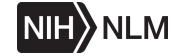

*Choosing to participate in a study is an important personal decision. Talk with your doctor and family members or friends about deciding to join a study. To learn more about this study, you or your doctor may contact the study research staff using the contacts provided below. For general information, [Learn About Clinical Studies](#).*

Ages Eligible for Study: 4 Years to 12 Years (Child)

Sexes Eligible for Study: All

Accepts Healthy Volunteers: Yes

#### Criteria

##### Inclusion Criteria:

- All children and their caregivers enrolled at one of the participating schools

##### Exclusion Criteria:

- None. Participants who switch schools during the four-year study period will not be followed-up.

## Contacts and Locations

Go to 

### Information from the National Library of Medicine

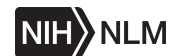

*To learn more about this study, you or your doctor may contact the study research staff using the contact information provided by the sponsor.*

*Please refer to this study by its ClinicalTrials.gov identifier (NCT number):*

**NCT02800616**

#### Sponsors and Collaborators

Maastricht University

#### Investigators

Principal Investigator: Onno van Schayck, Prof. Dr. Professor at Maastricht University

For peer review only - <http://bmjopen.bmj.com/site/about/guidelines.xhtml>

## More Information

Go to 

### Additional Information:

[Official website about this project for various stakeholders \(in Dutch\)](#) 

### Publications automatically indexed to this study by ClinicalTrials.gov Identifier (NCT Number):

[Willeboordse M, Jansen MW, van den Heijkant SN, Simons A, Winkens B, de Groot RH, Bartelink N, Kremers SP, van Assema P, Savelberg HH, de Neubourg E, Borghans L, Schils T, Coppens KM, Dietvorst R, Ten Hoopen R, Coomans F, Klosse S, Conjaerts MH, Oosterhoff M, Joore MA, Ferreira I, Muris P, Bosma H, Toppenberg HL, van Schayck CP. The Healthy Primary School of the Future: study protocol of a quasi-experimental study. BMC Public Health. 2016 Jul 26;16:639. doi: 10.1186/s12889-016-3301-9. Erratum in: BMC Public Health. 2017 Apr 11;17 \(1\):314.](#)

Responsible Party: Maastricht University  
ClinicalTrials.gov Identifier: [NCT02800616](#) [History of Changes](#)  
Other Study ID Numbers: UM MOVARE GGD  
First Posted: June 15, 2016 [Key Record Dates](#)  
Last Update Posted: June 15, 2016  
Last Verified: March 2016

### Individual Participant Data (IPD) Sharing Statement:

Plan to Share IPD: No

### Keywords provided by Maastricht University:

|                             |                   |
|-----------------------------|-------------------|
| Academic Achievement        | Obesity           |
| Accelerometry               | Physical Activity |
| Children                    | Prevention        |
| Primary school Intervention | School Health     |
| Nutrition                   |                   |

### Additional relevant MeSH terms:

|                  |                     |
|------------------|---------------------|
| Overweight       | Body Weight         |
| Malnutrition     | Signs and Symptoms  |
| Mental Disorders | Nutrition Disorders |

# BMJ Open

## Can the Healthy Primary School of the Future offer perspective in the on-going obesity epidemic in young children? – a Dutch quasi-experimental study

|                                 |                                                                                                                                                                                                                                                                                                                                                                                                                                                                                |
|---------------------------------|--------------------------------------------------------------------------------------------------------------------------------------------------------------------------------------------------------------------------------------------------------------------------------------------------------------------------------------------------------------------------------------------------------------------------------------------------------------------------------|
| Journal:                        | <i>BMJ Open</i>                                                                                                                                                                                                                                                                                                                                                                                                                                                                |
| Manuscript ID                   | bmjopen-2019-030676.R1                                                                                                                                                                                                                                                                                                                                                                                                                                                         |
| Article Type:                   | Original research                                                                                                                                                                                                                                                                                                                                                                                                                                                              |
| Date Submitted by the Author:   | 23-Aug-2019                                                                                                                                                                                                                                                                                                                                                                                                                                                                    |
| Complete List of Authors:       | Bartelink, N; Maastricht University, van Assema, Patricia; Maastricht University<br>Kremers, Stef; Maastricht University<br>Savelberg, H. H.; Maastricht University<br>Oosterhoff, Marije; Maastricht University Medical Centre<br>Willeboordse, Maartje; Maastricht University<br>van Schayck, Onno; Maastricht University, HAG<br>Winkens, Bjorn; Maastricht University,<br>Jansen, Maria; Academic Collaborative Centre for Public Health Limburg;<br>Maastricht University |
| <b>Primary Subject Heading</b>: | Public health                                                                                                                                                                                                                                                                                                                                                                                                                                                                  |
| Secondary Subject Heading:      | Public health                                                                                                                                                                                                                                                                                                                                                                                                                                                                  |
| Keywords:                       | PUBLIC HEALTH, PREVENTIVE MEDICINE, Community child health < PAEDIATRICS                                                                                                                                                                                                                                                                                                                                                                                                       |
|                                 |                                                                                                                                                                                                                                                                                                                                                                                                                                                                                |

SCHOLARONE™  
Manuscripts

# Can the Healthy Primary School of the Future offer perspective in the on-going obesity epidemic in young children? – a Dutch quasi-experimental study

1  
2  
3  
4  
5  
6  
7  
8  
9  
10  
11  
12  
13  
14  
15  
16  
17  
18  
19  
20  
21  
22  
23  
24  
25  
26  
27  
28  
29  
30  
31  
32  
33  
34  
35  
36  
37  
38  
39  
40  
41  
42  
43  
44  
45  
46  
47  
48  
49  
50  
51  
52  
53  
54  
55  
56  
57  
58  
59  
60

1 Nina H.M. Bartelink, MSc <sup>1,2,3\*</sup> [n.bartelink@maastrichtuniversity.nl](mailto:n.bartelink@maastrichtuniversity.nl); +31 43 3882401  
2 Patricia van Assema, PhD <sup>1,2</sup> [p.vanassema@maastrichtuniversity.nl](mailto:p.vanassema@maastrichtuniversity.nl); +31 43 3882403  
3 Stef P.J. Kremers, PhD <sup>2</sup> [s.kremers@maastrichtuniversity.nl](mailto:s.kremers@maastrichtuniversity.nl); +31 43 3882431  
4 Hans H.C.M. Savelberg, PhD <sup>5</sup> [hans.savelberg@maastrichtuniversity.nl](mailto:hans.savelberg@maastrichtuniversity.nl); +31 43 3881392  
5 Marije Oosterhoff, MSc <sup>6</sup> [marije.oosterhoff@mumc.nl](mailto:marije.oosterhoff@mumc.nl); +31 43 3875587  
6 Maartje Willeboordse, PhD <sup>7</sup> [maartje.willeboordse@maastrichtuniversity.nl](mailto:maartje.willeboordse@maastrichtuniversity.nl); +31 43 3884103  
7 Onno C.P. van Schayck, PhD <sup>7</sup> [onno.vanschayck@maastrichtuniversity.nl](mailto:onno.vanschayck@maastrichtuniversity.nl); +31 43 3882150  
8 Bjorn Winkens, PhD <sup>8</sup> [bjorn.winkens@maastrichtuniversity.nl](mailto:bjorn.winkens@maastrichtuniversity.nl); +31 43 3882433  
9 Maria W.J. Jansen, PhD <sup>3,4</sup> [maria.jansen@ggdzl.nl](mailto:maria.jansen@ggdzl.nl); +31 43 3881567

16 1 Department of Health Promotion, Care and Public Health Research Institute (CAPHRI), Maastricht  
17 University, P.O. Box 616 6200 MD Maastricht, The Netherlands.

18 2 Department of Health Promotion, School of Nutrition and Translational Research in Metabolism  
19 (NUTRIM), Maastricht University, P.O. Box 616, 6200 MD Maastricht, The Netherlands

20 3 Academic Collaborative Centre for Public Health Limburg, Public Health Services, P.O. Box 33, 6400  
21 AA Heerlen, The Netherlands

22 4 Department of Health Services Research, Care and Public Health Research Institute (CAPHRI),  
23 Maastricht University, P.O. Box 616, 6200 MD Maastricht, The Netherlands

24 5 Department of Nutrition and Movement Sciences, Nutrition and Translational Research in Metabolism  
25 (NUTRIM), Maastricht University, P.O. Box 616, 6200 MD Maastricht, The Netherlands

26 6 Department of Clinical Epidemiology and Medical Technology Assessment (KEMTA), Maastricht  
27 University Medical Centre MUMC+ / Care and Public Health Research Institute (CAPHRI), Maastricht  
28 University, P.O. Box 5800, 6202 AZ Maastricht, The Netherlands.

29 7 Department of Family Medicine, Care and Public Health Research Institute (CAPHRI), Maastricht  
30 University, P.O. Box 616, 6200 MD Maastricht, The Netherlands.

31 8 Department of Methodology and Statistics, Care and Public Health Research Institute (CAPHRI),  
32 Maastricht University, P.O. Box 616, 6200 MD Maastricht, The Netherlands

33  
34 \* Corresponding author: [n.bartelink@maastrichtuniversity.nl](mailto:n.bartelink@maastrichtuniversity.nl); Telephone: +31 43 3882401

1  
2  
3 **38 Abstract**

4  
5 **39 Objectives:** Schools play an important role in promoting healthy behaviours in children and can offer  
6  
7 40 perspective in the on-going obesity epidemic. The 'Healthy Primary School of the Future' (HPSF) aims  
8  
9 41 to improve children's health and well-being by enhancing school health promotion. The current study  
10  
11 42 aims to assess the effect of HPSF on children's BMI z-score after one and two years' follow-up and to  
12  
13 43 investigate whether HPSF has different effects within specific subgroups of children.

14  
15 44 **Design:** A longitudinal quasi-experimental design.

16  
17 45 **Setting:** Four intervention and four control schools participated; located in a low socio-economic status  
18  
19 46 region in the Netherlands.

20  
21 47 **Participants:** 1676 children (aged 4-12 years).

22  
23 48 **Interventions:** HPSF uses a contextual systems approach and includes health-promoting changes in  
24  
25 49 the school. Central to HPSF are the provision of a daily healthy lunch and structured physical activity  
26  
27 50 sessions each day. Two intervention schools implemented both changes (full HPSF), two intervention  
28  
29 51 schools implemented only the physical activity change (partial HPSF).

30  
31 52 **Main outcome measures:** BMI z-score, determined by measurements of children's height and weight  
32  
33 53 at baseline, after one and two years' follow-up.

34  
35 54 **Results:** The intervention effect was significant after one-year follow-up in the partial HPSF  
36  
37 55 (standardized effect size  $ES=-0.05$ ), not significant in the full HPSF ( $ES=-0.04$ ). After two years' follow-  
38  
39 56 up, BMI z-score had significantly decreased in children of both the full HPSF ( $ES=-0.08$ ) and the partial  
40  
41 57 HPSF ( $ES=-0.07$ ) compared with children of the control schools, whose mean BMI z-score increased  
42  
43 58 from baseline to two years. None of the potential effect-modifiers (gender, baseline study year, socio-  
44  
45 59 economic status, and baseline weight status) were significant.

46  
47 60 **Conclusions:** HPSF was effective after one and two years' follow-up in lowering children's BMI z-  
48  
49 61 scores. No specific subgroups of children could be identified who benefitted more from the intervention.

50  
51 62 **Trial registration:** The study was registered in the ClinicalTrials.gov database on 14 June 2016  
52  
53 63 (NCT02800616).

54  
55 64

56  
57 65

58  
59 66

60  
61 67

1  
2  
3 **68 Strengths and limitations of this study**  
4

- 5 69 • Due to the longitudinal quasi-experimental study design, we were able to test the effectiveness  
6  
7 70 in terms of differences in children's health behaviours between the three school groups over  
8  
9 71 time, and were also able to enroll schools on the basis of motivation, which reflects the real-life  
10  
11 72 situation of school health promotion.  
12  
13 73 • Since the lack of randomization could have resulted in confounding bias, we controlled for  
14  
15 74 baseline BMI z-score, gender, study year at T0, SES score, and ethnicity in all analyses.  
16  
17 75 • The high number of children enrolled in the measurements, the low drop-out rate, and the  
18  
19 76 objectively measured BMI were strengths of this study.  
20  
21 77 • Due to some missing data, multiple imputations were used and a sensitivity analysis was  
22  
23 78 conducted, where only complete cases were included.  
24  
25 79 • Participants did not significantly differ from non-responders in the participating schools and other  
26  
27 80 children in the region with regard to health and lifestyle.  
28  
29 81

## 82 Introduction

83 Overweight and obesity can lead to health problems, such as type 2 diabetes, cardiovascular diseases,  
84 and psychological problems (e.g., low self-esteem) [1, 2]. Globally, the prevalence of overweight and  
85 obesity among children and adolescents (aged 5-19) has risen dramatically from 4% in 1975 to more  
86 than 18% in 2016 [3, 4]. The prevalence is highest among children with a low socio-economic  
87 background [5]. In the Netherlands, the prevalence of childhood overweight and obesity has also  
88 increased in the last decennia: 13–15% of children (aged 2–21 years) are overweight, and 1.8–2.2%  
89 are classified as obese, which is a 2- to 3-fold increase compared with 1980 [6]. The ongoing epidemic  
90 increase is particularly caused by unhealthy behaviours, such as unhealthy dietary intake and low levels  
91 of physical activity (PA) [7]. The health behaviours of children in the Netherlands are suboptimal. For  
92 example, 42% of children (aged 4–9 years) consume at least 150 g of fruit per day, which drops to 20%  
93 for 9–12 year olds [8]. Regarding PA, only half (48%) of Dutch children (aged 4–12) meet the guidelines  
94 for PA of 60 min of moderate-to-vigorous physical activity (MVPA) per day [9]. Unhealthy behaviours at  
95 a young age often track into adulthood [10] and are related to health and psychosocial problems,  
96 reduced quality of life, higher health care costs, lower educational achievement and labor participation  
97 [11-13]. A vicious circle is emerging, transferring problems, such as obesity, from one generation to the  
98 next [14]. Promoting healthy behaviours at an early age may help to improve children's health on the  
99 short and long run [10]. Moreover, promoting health behaviours could also lead to better educational  
100 and academic achievements, which have been found to be related to improved health in later life as well  
101 [15].

102  
103 Schools can play an important role in promoting healthy behaviours in children since a significant  
104 proportion of a child's day is spent there and they reach all children [16-18]. As such, school-based  
105 interventions may be an important instrument to offer perspective in the on-going obesity epidemic in  
106 young children. Many different school-based interventions (e.g. related to education, environment,  
107 policy, monitoring) have been implemented to integrate health into the school system and reduce  
108 childhood overweight and obesity. The meta-analysis of both Cook-Cottone et al. and Oosterhoff et al.  
109 found that the significant effect of school-based interventions on children's Body Mass Index (BMI) z-  
110 score had an overall weighted effect size of approximately -0.05 [19, 20]. Several studies indicated that  
111 effects are often hampered by underestimation of the challenges associated with implementing



1  
2  
3 112 meaningful changes to the school system [21-23]. These challenges occur because an intervention  
4  
5 113 always interacts with the specific school context [22, 23]. Therefore, solutions for the challenges  
6  
7 114 associated with changing school systems vary between schools as they all have their own dynamics  
8  
9 115 [22-24]. Consequently, an intervention can be seen as an attempt to positively disrupt the prior  
10  
11 116 functioning of a school system [25, 26]. Some other reviews stated that specific subgroups of children  
12  
13 117 benefit more from a school-based intervention. The review of Stewart-Brown et al. [27] found that several  
14  
15 118 studies indicated gender-specific results, with some school-based interventions being more effective in  
16  
17 119 girls and others in boys. Age-specific effects were often found, with some interventions being more  
18  
19 120 effective in older children and others in younger children [27]. Cook-Cotton et al. found that children's  
20  
21 121 socio-economic background can be an influential factor and that children already having overweight can  
22  
23 122 respond more slowly or to a lesser extent to school-based interventions than children with a healthy  
24  
25 123 weight [19].

26 124  
27  
28 125 A Dutch initiative that embraces a contextual systems approach is the 'Healthy Primary School of the  
29  
30 126 Future' (HPSF) [28, 29]. HPSF aims to improve the health and well-being of all children in the school  
31  
32 127 which should contribute to a healthier future generation and thereby offer perspective in the on-going  
33  
34 128 obesity epidemic [30]. HPSF includes top-down and bottom-up processes to create health-promoting  
35  
36 129 changes in the school. Two changes were initiated to create some form of positive disruption in the  
37  
38 130 school: 1) providing a free healthy lunch each day and 2) daily structured physical activity (PA) sessions  
39  
40 131 after lunch. While in other national school systems this may represent usual practice, these changes  
41  
42 132 are hypothesized as disruptive to the Dutch school system because the provision of school lunches and  
43  
44 133 structured PA sessions are not usual practice in Dutch schools. The two changes aimed to create  
45  
46 134 momentum to implement additional health-promoting changes in the school, such as a healthy school  
47  
48 135 policy or creating a PA-friendly schoolyard. All changes together should favourably affect the health  
49  
50 136 behaviours of all school children, which should lead to improved health and a more normal weight status  
51  
52 137 [28, 29].

53 138  
54  
55 139 The aim of the current study was to assess the effect of HPSF on children's BMI z-score after one and  
56  
57 140 two years' follow-up and to investigate whether HPSF has different effects within specific subgroups of  
58  
59 141 children. The current study is part of an overall study to investigate HPSF. The overall study has a broad  
60

1  
2  
3 142 scope and includes a multi-disciplinary research group, which focuses on many different outcomes, such  
4  
5 143 as children's health behaviours, educational achievements, and well-being. The studies that have been  
6  
7 144 published previously, focused on the implementation process of HPSF [31] and the effects of HPSF on  
8  
9 145 children's dietary and PA behaviours [32]. The current study explicitly concentrates on children's BMI z-  
10  
11 146 score to focus in much detail on the primary outcome as described in the study design of Willeboordse  
12  
13 147 et al. [28].

14  
15 148

## 16 149 **Methods**

### 17 150 **Study design**

18  
19  
20 151 The current study had a longitudinal quasi-experimental design with four intervention schools and four  
21  
22 152 control schools, which maintained the school curriculum that is currently common practice in the  
23  
24 153 Netherlands. Ethical approval (14-N-142) was given by the Zuyderland Medical Ethics Committee  
25  
26 154 located in Heerlen (Parkstad, the Netherlands). Parents had to sign an informed consent form to  
27  
28 155 participate in all measurements for themselves and their child(ren). Measurements were conducted in  
29  
30 156 September-November of 2015 (T0), 2016 (T1) and 2017 (T2). A detailed description of the study and  
31  
32 157 the power calculation is reported in Willeboordse et al. [28].

33  
34 158

### 35 159 **The Healthy Primary School of the Future**

36  
37 160 Three collaborating organisations, i.e., the regional educational board 'Movare', the regional public  
38  
39 161 health services and Maastricht University, developed the idea for HPSF [28]. In March 2013, 12 out of  
40  
41 162 53 schools governed by the Movare educational board were informed about the initiative. Four schools  
42  
43 163 gave their initial consent and spent a whole school year (2014/2015) creating bottom-up support for  
44  
45 164 HPSF. Two of the four intervention schools decided to implement both the daily lunch and the structured  
46  
47 165 PA sessions and are referred to as the 'full HPSF'. The other two intervention schools decided to only  
48  
49 166 implement the structured PA sessions, and are referred to as the 'partial HPSF'. All schools could  
50  
51 167 implement additional health-promoting changes, that fit their school context [29, 31]. The full HPSF  
52  
53 168 improved their health policy, provided water bottles to all children, and provided an educational lunch  
54  
55 169 once a week. The partial HPSF did not implement additional health-promoting changes.

56  
57 170 Implementation started in all four intervention schools in November 2015. The time for having  
58  
59 171 lunch (in the full HPSF) was increased to 20–30 min. The total lunch break time in these schools was  
60

1  
2  
3 172 prolonged by about 60 min. For this reason, the school day was extended: children of the full HPSF  
4  
5 173 attend school to approximately 15:30/15:45 instead of 15:00. A dietician of the caterer developed a lunch  
6  
7 174 menu cycle that changed every 10 weeks, in which at least 80% of the products met the advice of the  
8  
9 175 Dutch Health Council [33]. A mid-morning snack, consisting of fruits and/or nuts, was also provided. The  
10  
11 176 lunch, a bread-based cold meal, was typically Dutch. During lunch break time, the children participated  
12  
13 177 several times a week in structured PA sessions; one or two times per week they could participate in  
14  
15 178 cultural activities. The PA sessions were carried out in the schoolyard and, when available and needed,  
16  
17 179 in parks, forest, and/or sports hall in the neighbourhood. All schools collaborated with sport clubs or  
18  
19 180 other external partners to offer specific activities as well. Since the two changes were contextualized  
20  
21 181 bottom-up, this resulted in some differences between schools in the form of the changes; the content  
22  
23 182 remained comparable.

24 183         The two changes, i.e. providing daily a free healthy lunch and structured PA sessions after  
25  
26 184 lunch, were both led by external pedagogical employees provided by childcare organizations to not  
27  
28 185 increase the workload of teachers even further. This integration of the childcare organization during  
29  
30 186 school hours is not to provide a temporary solution, but to change the school's organization in a  
31  
32 187 sustainable way. The aim for the future is to bring school and childcare more together and thereby create  
33  
34 188 an integrated day for children, whereby children are supervised by the same people prior, during and  
35  
36 189 after school hours. Employees of sports and leisure organizations supported the external pedagogical  
37  
38 190 employees during implementation when needed, and after a year they provided a training course (8  
39  
40 191 sessions of 2h) to supply them with additional tools for how to motivate children for active participation  
41  
42 192 during the PA sessions. A health promoter from the regional Public Health Services was assigned to  
43  
44 193 each school to provide support when needed. In this study, researchers from Maastricht University  
45  
46 194 monitored and fed back results to the schools to support the processes of change. Funding for  
47  
48 195 implementation of HPSF is provided by the provincial authorities until the end of 2019. However, the  
49  
50 196 four schools have committed to continued implementation after 2019 and make the changes sustainable  
51  
52 197 in their school.

53 198

### 54 199 **Patient and public involvement**

56 200 Public involvement was a key feature of HPSF. This intervention intended to establish a co-creation  
57  
58 201 movement in schools aimed at the systematic incorporation of health and well-being. The two top-down  
59  
60

1  
2  
3 202 changes and the additional health-promoting changes were developed and contextualized by bottom-  
4  
5 203 up involvement. Teachers and parents were involved from the start in the adoption decision and the  
6  
7 204 process of adapting the several changes into the school context. Moreover, all four schools used a  
8  
9 205 children voice group, with representatives from each class in school, to get insight into the opinion of  
10  
11 206 children regarding HPSF. In this way, the experiences of children were being heard and the changes  
12  
13 207 could be further contextualized to fit better to the children's needs and wishes. Each of the four  
14  
15 208 intervention schools selected a teacher as school coordinator, who managed HPSF in their school.  
16  
17 209 Overarching, HPSF was led by an executive board with representatives of the three collaborating  
18  
19 210 organisations: Movare, the regional public health services and Maastricht University. They discussed  
20  
21 211 the study design, the relevant outcome measures, and the interpretation of the results. The  
22  
23 212 representative of Movare advised explicitly on school and participant recruitment and the communication  
24  
25 213 to schools. A project team was created with representatives of all partners involved: the four schools,  
26  
27 214 Movare, regional Public Health Services, Maastricht University, the Limburg provincial authorities,  
28  
29 215 childcare organizations, the caterer, and sports and leisure organizations. No patients were involved in  
30  
31 216 this study.

32 217

### 33 218 **Study population**

35 219 All intervention and control schools are situated in the Parkstad region in the southern part of the  
36  
37 220 Netherlands. This region has a low average socio-economic status (SES), and unhealthy lifestyle  
38  
39 221 behaviours and overweight are highly prevalent compared with the rest of the Netherlands [34]. More  
40  
41 222 information on the recruitment of the schools has been described elsewhere [28]. All children (N=2326  
42  
43 223 at T0) and their parents in the eight schools were invited to participate in the study. This included children  
44  
45 224 from study year one to eight (age 4 to 12 years), which is comparable to two years of Kindergarten and  
46  
47 225 six primary school grades. Recruitment was done via information brochures for parents. In addition, the  
48  
49 226 research team visited the classrooms to inform children about the study and encourage them to ask  
50  
51 227 their parents for participation [28]. Due to the dynamic population in the schools (new children enter and  
52  
53 228 other children finish school each year), we focused in this study only on the children who were enrolled  
54  
55 229 in the schools at baseline till the end of this 2-year study. The population of children included in this  
56  
57 230 study were: at baseline (T0) children from study year one to seven, at T1 children from study year two  
58  
59 231 to eight, and at T2 children from study year three to eight. Children of these study years who joined the  
60

1  
2  
3 232 study at T1 or T2 were included, even though no baseline data was available. Even though these  
4  
5 233 children joined the study later, they were at baseline already participating in their school and thus also  
6  
7 234 exposed to HPSF during the full 2 years of this study. Children who switched to other schools between  
8  
9 235 2015 and 2017 were excluded.

10 236

### 11 237 **Measurements**

12 238 In each school, the data were gathered annually during one week of measurements. Inter-rater variability  
13  
14 239 was minimised by training researchers according to a strict protocol [28]. Children's age, study year,  
15  
16 240 and gender were collected via the database of the educational board Movare. A digital questionnaire for  
17  
18 241 parents was used to obtain information about the children's socioeconomic background and ethnicity.  
19  
20 242 SES was calculated as the mean of standardized scores on maternal education level, paternal  
21  
22 243 educational level, and household income (adjusted for household size) [35]. The mean scores were  
23  
24 244 categorized into low, middle and high SES scores based on tertiles. Children's ethnicity was determined  
25  
26 245 by the country of birth of both parents and divided into 1) Western background (including the  
27  
28 246 Netherlands) and 2) non-Western background [36]. If one of the parents was born in a non-Western  
29  
30 247 country, the child's ethnicity was assigned to non-Western. The distinction between Western and non-  
31  
32 248 Western was created because of differences in socio-economic and cultural position between the two  
33  
34 249 backgrounds [36].

35 250

### 36 251 *BMI z-score*

37 252 Anthropometric measurements, i.e., height, weight, hip and waist circumference, were conducted in  
38  
39 253 children from study year two to eight. The measurements were integrated in the school hours allocated  
40  
41 254 to physical education. Weight was measured to the nearest 0.1 kg (Weighing Scale 803, Seca,  
42  
43 255 Hamburg, Germany) and height was measured to the nearest 0.1 cm (Stadiometer 213, Seca,  
44  
45 256 Birmingham, United Kingdom). Hip and waist circumference were measured with a measuring tape to  
46  
47 257 the nearest 0.1 cm (model 201, Seca, Hamburg, Germany). Children were measured with light sports  
48  
49 258 clothing and no shoes. All anthropometric measurements were performed twice, and a third  
50  
51 259 measurement was conducted if the difference between the first two measurements exceeded a pre-set  
52  
53 260 limit (weight  $\geq 0.2$  kg, height  $\geq 0.5$  cm, hip and waist circumference  $\geq 1.0$  cm). Unfortunately, hip and  
54  
55 261 waist circumference were excluded from further analyses due to measurement errors. BMI was  
56  
57  
58  
59  
60

1  
2  
3 262 assessed by height and weight; age- and gender-specific BMI cut-off points were used to define  
4  
5 263 overweight and obesity [37]. BMI z-scores were calculated by using Dutch reference values [6].  
6

7 264

### 8 265 **Statistical analyses**

9  
10 266 Data were analyzed using IBM SPSS Statistics for Windows (version 23.0. Armonk, NY: IBM Corp).  
11  
12 267 Pearson's chi-square tests and ANOVA tests were conducted to analyze the comparability of the  
13  
14 268 observed participant characteristics among the full HPSF, the partial HPSF, and control schools at  
15  
16 269 baseline. Linear mixed model analyses were used to assess the longitudinal intervention effects on the  
17  
18 270 children's BMI z-score. Since measurements were repeated within participants, we used a two-level  
19  
20 271 model with repeated measurements as the first level and participants as the second level, where an  
21  
22 272 unstructured covariance structure was considered for the repeated measures. The fixed part of the  
23  
24 273 model consisted of group (full HPSF, partial HPSF, and Control), time (T0, T1, T2) and the interaction  
25  
26 274 terms of group with time. We were not able to include class as a level in the model, because often  
27  
28 275 several divisions of one class existed, e.g. 4a or 4b, and children often did not have fixed class divisions  
29  
30 276 for all years. All analyses were adjusted for gender, study year at baseline, SES, and ethnicity. Missing  
31  
32 277 covariates and BMI z-scores were imputed using multiple imputation method with fully conditional  
33  
34 278 specification (FCS) and 10 iterations, generating 50 complete datasets. Gender, study year at baseline,  
35  
36 279 school type, ethnicity, SES score, and BMI z-score were used to impute the missing data. We performed  
37  
38 280 two sensitivity analyses. First, we replicated the analyses by only selecting the children who had no  
39  
40 281 missing BMI z-score at all three time points (complete-case analysis). Second, we replicated the  
41  
42 282 analyses while excluding children with an extremely low BMI z-score at baseline (BMI z-score  $\leq -2$ ), to  
43  
44 283 study the effects only in children for which a decrease in BMI z-score is favourable.  
45

46 284

47 285 To study whether the intervention effects were similar for all subgroups of children, the following potential  
48  
49 286 effect modifiers were considered: gender (boys/girls), study year at baseline (lower (1-4)/higher (5-8)  
50  
51 287 grades), SES (low/middle/high) and baseline weight status (non-overweight/overweight). To assess this  
52  
53 288 potential effect modification, the interaction term group\*time\*effect modifier, with all corresponding two-  
54  
55 289 way interactions, was added to the above mentioned model. If this interaction term was significant (here  
56  
57 290 we used a significance level of 0.10 to deal with the fact that the power of a test for interaction is relatively  
58  
59 291 low and we did not want to miss any effect-modification), the intervention effects were reported for all  
60

292 categories of the effect-modifier separately. For all other analyses, a two-sided p-value  $\leq 0.05$  was  
293 considered statistically significant. Standardized effect sizes (ES) at each time-point were included,  
294 which were defined as estimated mean difference at that time point (T1 or T2) divided by the square  
295 root of the residual variance at baseline (pooled over all three groups).

296

## 297 Results

298 Of all children (n=2326) invited to participate in the (overall) study, 60.3% joined the study at baseline  
299 (n=1403) (Figure 1). Because of the study's dynamic population, a total of 1974 children and their  
300 parents participated in the study within the two-year follow-up period (data collected at one time-point at  
301 least). Due to the selection used for the current study, i.e., only including the children who were in study  
302 year one to seven at baseline, we included 1676 children in the analysis. Of these children, 47.4% were  
303 boys, their mean age was 7.5 years old, and 94.1% had a Western ethnicity (Table 1). In total, 19.9%  
304 of these children suffered from overweight or obesity, which is higher compared with the national  
305 average of 13% [38]. BMI z-scores at baseline differed significantly between the three school groups  
306 ( $p=0.034$ ): the average BMI z-score of children in the control schools (z-score=0.232) was higher  
307 compared with children in the full HPSF (z-score=0.051) and the partial HPSF (z-score=0.092).  
308 Significantly more children suffered from overweight or obesity in these control schools (24.1%) than  
309 the full HPSF (16.5%) and the partial HPSF (17.9%) ( $p=0.006$ ).

310

311 Figure 1. *Flowchart*

312

313 Table 1. *Characteristics of study sample at baseline (T0)*

314

315 Observed data at T1 showed a decrease in BMI z-score compared with baseline in all three groups,  
316 with the full HPSF ( $\Delta z$ -score: -0.074) and the partial HPSF ( $\Delta z$ -score: -0.098) having the largest  
317 decrease, and control schools a smaller decrease ( $\Delta z$ -score: -0.018). At T2, a decrease in BMI z-score  
318 compared with baseline was observed in the full HPSF ( $\Delta z$ -score: -0.039) and the partial HPSF ( $\Delta z$ -  
319 score: -0.012), and an increase in the control schools ( $\Delta z$ -score: +0.058) (Figure 2). The extent of  
320 observed increase or decrease at T1 and T2 compared with baseline of individual children in the three  
321 different groups is visualized in Figure S1 (Supplementary file 1). This figure shows that compared to

1  
2  
3 322 the control schools, in the full and partial HPSF a higher percentage of children had decreased BMI z-  
4  
5 323 scores. This was particularly visible after one-year follow-up. The figure also indicates that, on an  
6  
7 324 individual level, mostly minimal to moderate changes ( $-0.6 \leq \Delta z\text{-score} \leq +0.6$ ) were realized. The  
8  
9 325 variation in changes increased over time, i.e. the percentage of large and extreme decreases and  
10  
11 326 increases was larger after two years' follow-up compared with one-year follow-up.

12  
13 327

14 328 *Figure 2. Observed change in children's BMI z-score at one year and two years' follow-up*

15  
16 329

17  
18 330 Mixed model analyses were conducted to study the differences in effect among the three groups. The  
19  
20 331 intervention effect was, compared with control schools, significant after one-year follow-up in the partial  
21  
22 332 HPSF (ES=-0.05), not significant in the full HPSF (ES=-0.04) (Table 2). After two years' follow-up a  
23  
24 333 significant intervention effect on children's BMI z-score was found in both versions of HPSF. Children's  
25  
26 334 BMI z-score had decreased significantly more in the full HPSF (ES=-0.08) and the partial HPSF (ES=-  
27  
28 335 0.07), compared with children of the control schools, whose estimated mean BMI z-score increased  
29  
30 336 from baseline to two years as reported above. No significant difference in effect was found between the  
31  
32 337 full and partial HPSF at T1 and T2. Both complete case analyses (N=759) and the sensitivity analyses  
33  
34 338 in which children with an extremely low BMI z-score at baseline were excluded (N<sub>excluded</sub>=14), resulted  
35  
36 339 in comparable effect sizes. None of the interaction terms of the potential effect modifiers, i.e., gender,  
37  
38 340 study year, SES and weight status, was significant (Table S1 in Supplementary file 1).

39  
40 341

41 342 *Table 2. One- and two-year estimated intervention effects on children's BMI z-score*

42  
43 343

## 44 344 **Discussion**

45  
46  
47 345 This study assessed the effects of HPSF on children's BMI z-score after one and two years' follow-up  
48  
49 346 compared with children of control schools. The findings showed a favourable decreasing effect at T2 on  
50  
51 347 children's BMI z-scores in both the full HPSF (standardized effect size (ES) =-0.08) and the partial HPSF  
52  
53 348 (ES=-0.07) compared with control schools, where the BMI z-score actually increased at T2 compared  
54  
55 349 with baseline. According to Lipsey's guidelines [39], these findings can be indicated as a small effect  
56  
57 350 (effect size between 0 and 0.32). These small intervention effects are promising for three reasons: 1)  
58  
59 351 they are already visible after two years of implementation, 2) they indicate a change in the increasing



1  
2  
3 352 BMI trend observed in the control schools, and 3) they are slightly higher than the effect sizes found in  
4  
5 353 several meta-analyses regarding school-based interventions [19, 20, 40]. The decrease in BMI z-score  
6  
7 354 found in this study in the full and partial HPSF can therefore be considered as a favourable and  
8  
9 355 promising intervention effect. No significant differences were found between the full and partial HPSF.  
10  
11 356 The main distinction between them was the provision of a healthy lunch. However, the process  
12  
13 357 evaluation of Bartelink et al. has shown that providing this lunch led to the implementation of additional  
14  
15 358 health-promoting changes (e.g. health promoting policy, educational lunch) [31]. Additional health-  
16  
17 359 promoting changes were not implemented in the partial HPSF [31]. However, since no significant  
18  
19 360 differences were found between the full and partial HPSF, this might indicate that the differences  
20  
21 361 between the two versions of HPSF did not have an additional favourable effect on the children's BMI z-  
22  
23 362 score.

24 363  
25  
26 364 The favourable effects on children's BMI z-scores seem to indicate that the children improved their  
27  
28 365 health behaviours. Indeed, significant favourable intervention effects were found after one- and two-  
29  
30 366 years' follow-up for the full HPSF on children's dietary behaviours for, among others, school water  
31  
32 367 consumption and lunch intake of vegetables and dairy products [32]. Children's sedentary time and light  
33  
34 368 PA significantly improved after two years' follow-up. Almost no significant favourable results on  
35  
36 369 children's health behaviours were found in the partial HPSF. Since it is the co-existence and interaction  
37  
38 370 of several nutrition and PA behaviours that results in a positive (or negative) energy balance and weight  
39  
40 371 gain (or loss) [41, 42], the results suggest that many small improvements on several different health  
41  
42 372 behaviours have occurred in the children of the partial HPSF, leading to the favourable effects on their  
43  
44 373 BMI z-score.

45 374  
46  
47 375 Even though the effects of HPSF on children's BMI z-score seem promising, it is important to realize  
48  
49 376 that two years' follow-up is too short to conclude that HPSF has led to sustainable changes. A longer  
50  
51 377 follow-up period is needed to study whether the results found are not only due to the children's  
52  
53 378 enthusiasm for and cooperation with the new changes in school, which might result in intervention  
54  
55 379 effects that diminish after longer follow-up periods. This can be the reason for the smaller observed  
56  
57 380 change scores after two years' follow-up compared to after one year, shown in Figure 2. On the other  
58  
59 381 hand, the favourable results that are still found after two years' follow-up might indicate that new habits

1  
2  
3 382 and routines have developed in children's health behaviours. The latter is not easy to change and  
4  
5 383 requires a shift in the social norms of all people in the school regarding 'normal' health behaviours.  
6  
7 384 Therefore, further research into HPSF should investigate its long-term effects on children's BMI z-score.  
8  
9 385 Other outcomes should also be investigated to study the effects of HPSF, including children's  
10  
11 386 educational achievements and well-being and the cost-effectiveness of the intervention. This broader  
12  
13 387 scope of the effects of HPSF is included in the overall study design and will be investigated by our multi-  
14  
15 388 disciplinary research group [28]. The specific focus in the current study enabled us to investigate the  
16  
17 389 effects of HPSF on children's BMI z-score in much more detail.

18 390  
19  
20 391 The second research question investigated whether HPSF has different effects within specific  
21  
22 392 subgroups of children. Effect-modification analyses showed no significant interactions at T1 and T2.  
23  
24 393 However, effect sizes give a better indication since the big difference in group sizes in the subgroups  
25  
26 394 of, for example, children's weight status, influenced the p-value. All effect sizes showed similar patterns  
27  
28 395 to the overall analyses. These results seem to indicate that no specific subgroups of children were found  
29  
30 396 to benefit more from HPSF, which is promising as often school-based interventions only seem effective  
31  
32 397 for specific subgroups [19, 27]. These results are especially promising when related to health  
33  
34 398 inequalities, because even when interventions are successful in improving children's health, they may  
35  
36 399 still increase health inequalities. This can happen when an intervention is of greater benefit to  
37  
38 400 advantaged groups, e.g., high SES, than to disadvantaged groups, e.g., low SES [43]. Given the results  
39  
40 401 of the effect modification analyses, HPSF can be seen as an example of an intervention that does not  
41  
42 402 seem to increase health inequalities among children. Further research with longer follow-up periods  
43  
44 403 should investigate whether HPSF contributes to reducing the health inequalities.

45 404

#### 47 405 **Limitations and strengths**

48  
49 406 The longitudinal quasi-experimental design can be seen as a limitation of this study, since we were  
50  
51 407 unable to (cluster-) randomize schools. However, due to this design, we were able to test the  
52  
53 408 effectiveness in terms of differences in children's BMI z-scores between the three school groups over  
54  
55 409 time, and were also able to enroll schools on the basis of motivation, which reflects the real-life situation  
56  
57 410 of school health promotion. Moreover, participants did not significantly differ from non-responders in the  
58  
59 411 participating schools and other children in the region with regard to health and lifestyle [44]. The lack of  
60

1  
2  
3 412 randomization could, however, have resulted in confounding bias. Therefore, we controlled for baseline  
4  
5 413 BMI z-score, gender, study year at T0, SES score, and ethnicity in all analyses. The significant  
6  
7 414 differences in children's BMI z-scores at baseline between the three groups could indicate that children  
8  
9 415 in the control schools are less open to change: their habits in unhealthy behaviours are stronger as they  
10  
11 416 have already led to overweight or obesity. On the other hand, this difference, which we controlled for,  
12  
13 417 may have resulted in an underestimation of the effect: more room for improvement existed for the  
14  
15 418 children in the control schools compared with the full and partial HPSF.

16 419         Next, HPSF seemed to affect all children in the intervention schools. However, a decrease in  
17  
18 420 BMI z-score might not be favourable for all of them, for example when they already have an extremely  
19  
20 421 low BMI z-score. Therefore, to ensure that the findings reflected the children for whom a decrease in  
21  
22 422 BMI z-score is favourable, we conducted extra sensitivity analyses in which we excluded the children  
23  
24 423 with extremely low BMI z-scores at baseline. These analyses showed comparable results. The high  
25  
26 424 number of children enrolled in the measurements, the low drop-out rate, and the objectively measured  
27  
28 425 BMI were other strengths of this study. There were missing data because some participants did not  
29  
30 426 participate from the start, other participants finished school before the last measurement period in 2017,  
31  
32 427 the parental questionnaire was not completed, respondents skipped questions, or data could not be  
33  
34 428 obtained due to the absence of the child. To deal with the missing data, multiple imputations were used,  
35  
36 429 and a sensitivity analysis, in which only complete cases were included, was conducted. Complete case  
37  
38 430 analysis showed similar results to the original analysis, which increased the reliability of the findings in  
39  
40 431 this study.

41 432

### 43 433 **Conclusions**

44  
45 434 Taking all the results and limitations into account, it can be concluded that HPSF was effective in  
46  
47 435 lowering children's BMI z-scores after one and two years' follow-up and no specific subgroups of children  
48  
49 436 were found to benefit more from the intervention. Even though longer follow-up periods are needed to  
50  
51 437 draw hard conclusions, both versions of the initiative seem promising in offering perspective in the on-  
52  
53 438 going obesity epidemic in young children.

54 439

55 440

56 441

57 441

58 441

59 441

60 441

1  
2  
3 **442 Acknowledgements**  
4

5 443 We are grateful to all of the schools, the children and other collaborating partners participating in the  
6  
7 444 project. We thank the PhD students and research assistants for their help in data collection.  
8

9 445

10  
11 **446 Competing interests**  
12

13 447 The authors declare that they have no competing interests.  
14

15 448

16  
17 **449 Ethics approval and consent to participate**  
18

19 450 Ethical approval was given by the Medical Ethics Committee Zuyderland located in Heerlen (MEC 14-  
20  
21 451 N-142). All participants were required to complete an informed consent form, signed by (both) parents.  
22

23 452

24  
25 **453 Data sharing**  
26

27 454 The data that support the findings of this study were collected as part of the 'Healthy Primary School of  
28  
29 455 the Future' quasi-experimental study. Data collection will take place until 2019 to study the effects after  
30  
31 456 4 years of exposure. Data on the 4-year effects and potential other comparative studies in the  
32  
33 457 Netherlands will become available following article publication.  
34

35 458

36  
37 **459 Funding**  
38

39 460 This study was funded by the Limburg provincial authorities, Project Number 200130003, by Friesland  
40  
41 461 Campina, Project Number LLMV00, and by Maastricht University. None of the funding bodies had a role  
42  
43 462 in the design of the study or the writing of this manuscript, nor in the data collection, analysis,  
44  
45 463 interpretation of data, and writing of publications.  
46

47 464

48  
49 **465 Authors' contributions**  
50

51 466 NB, PvA, SK, HS, MW, OvS, and MJ were part of designing the intervention. NB, MO, MW collected the  
52  
53 467 data for the manuscript. NB and BW analysed the data. NB drafted and revised the manuscript. PvA,  
54  
55 468 SK, HS, MO, MW, OvS, BW, and MJ critically reviewed the manuscript during the writing process. All  
56  
57 469 authors have read and approved the final manuscript.  
58

59 470

60 **471 Supplementary Information**

1  
2  
3 472 Supplementary file 1 (PDF): A graphical presentation of individual changes in BMI z-scores at one year  
4  
5 473 (T1) and two years' (T2) follow-up compared with baseline. A table with potential effect-modifiers of the  
6  
7 474 intervention effects on children's BMI z-score.  
8

9 475

## 10 476 **License statement**

11  
12  
13 477 The Submitting Author has the right to grant and does grant on behalf of all authors of the Work (as  
14  
15 478 defined in the below author licence), an exclusive licence and/or a non-exclusive licence for contributions  
16  
17 479 from authors who are: i) UK Crown employees; ii) where BMJ has agreed a CC-BY licence shall apply,  
18  
19 480 and/or iii) in accordance with the terms applicable for US Federal Government officers or employees  
20  
21 481 acting as part of their official duties; on a worldwide, perpetual, irrevocable, royalty-free basis to BMJ  
22  
23 482 Publishing Group Ltd ("BMJ") its licensees and where the relevant Journal is co-owned by BMJ to the  
24  
25 483 co-owners of the Journal, to publish the Work in BMJ Open and any other BMJ products and to exploit  
26  
27 484 all rights, as set out in our licence.  
28

29 485

## 30 486 **References**

- 31  
32 487 1. Ogden CL, Carroll MD, Flegal KM. Epidemiologic trends in overweight and obesity. *Endocrinol Metab*  
33  
34 488 *Clin North Am.* 2003;32(4):741-60.  
35  
36 489 2. Strauss RS. Childhood obesity and self-esteem. *J Pediatr.* 2000;105(1):e15-e.  
37  
38 490 3. WHO. Report of the commission on ending childhood obesity: World Health Organization; 2016.  
39  
40 491 4. WHO. Obesity and overweight 2018 [Available from: [http://www.who.int/en/news-room/fact-](http://www.who.int/en/news-room/fact-sheets/detail/obesity-and-overweight)  
41  
42 492 [sheets/detail/obesity-and-overweight](http://www.who.int/en/news-room/fact-sheets/detail/obesity-and-overweight).  
43  
44 493 5. Arcaya MC, Arcaya AL, Subramanian S. Inequalities in health: definitions, concepts, and theories.  
45  
46 494 *Glob Health Action.* 2015;8(1):27106.  
47  
48 495 6. Schönbeck Y, Talma H, van Dommelen P, Bakker B, Buitendijk SE, HiraSing RA, et al. Increase in  
49  
50 496 prevalence of overweight in Dutch children and adolescents: a comparison of nationwide growth studies  
51  
52 497 in 1980, 1997 and 2009. *PLoS One.* 2011;6(11):e27608.  
53  
54 498 7. Marmot M, Allen J, Bell R, Bloomer E, Goldblatt P. WHO European review of social determinants of  
55  
56 499 health and the health divide. *Lancet.* 2012;380(9846):1011-29.  
57  
58  
59  
60

- 1  
2  
3 500 8. CBS, RIVM, The Netherlands Nutrition Centre. Kinderen eten te weinig fruit, groente en vis [Children  
4 eat to less fruit, vegetables and fish] 2017 [Available from: [https://www.cbs.nl/nl-  
6 502 nl/nieuws/2017/46/kinderen-eten-te-weinig-fruit-groente-en-vis](https://www.cbs.nl/nl-<br/>5 501 nl/nieuws/2017/46/kinderen-eten-te-weinig-fruit-groente-en-vis).  
7  
8  
9 503 9. Volksgezondheidszorg.info. Beweeggedrag kinderen [Physical activity behaviour of children] 2018  
10 [Available from: [https://www.volksgezondheidszorg.info/onderwerp/sport-en-bewegen/cijfers-  
12 505 context/huidige-situatie#node-beweeggedrag-kinderen](https://www.volksgezondheidszorg.info/onderwerp/sport-en-bewegen/cijfers-<br/>11 504 context/huidige-situatie#node-beweeggedrag-kinderen).  
13  
14 506 10. Craigie AM, Lake AA, Kelly SA, Adamson AJ, Mathers JC. Tracking of obesity-related behaviours  
15 507 from childhood to adulthood: a systematic review. *Maturitas*. 2011;70(3):266-84.  
16  
17 508 11. Han E, Norton EC, Powell LM. Direct and indirect effects of body weight on adult wages. *Econ Hum  
18 509 Biol*. 2011;9(4):381-92.  
19  
20 510 12. Stein D, Weinberger-Litman SL, Latzer Y. Psychosocial perspectives and the issue of prevention in  
21 511 childhood obesity. *Front Public Health*. 2014;2.  
22  
23 512 13. Kelsey MM, Zaepfel A, Bjornstad P, Nadeau KJ. Age-related consequences of childhood obesity. *J  
24 513 Gerontol*. 2014;60(3):222-8.  
25  
26 514 14. Lynch JW, Kaplan GA, Salonen JT. Why do poor people behave poorly? Variation in adult health  
27 515 behaviours and psychosocial characteristics by stages of the socioeconomic lifecourse. *Soc Sci Med*.  
28 516 1997;44(6):809-19.  
29  
30 517 15. Suhrcke M, de Paz Nieves C. The impact of health and health behaviours on educational outcomes  
31 518 in high-income countries: a review of the evidence. Copenhagen, Denmark: World Health Organization,  
32 519 Regional Office for Europe 2011.  
33  
34 520 16. Dooris M, Poland B, Kolbe L, De Leeuw E, McCall DS, Wharf-Higgins J. Healthy settings. *Global  
35 521 perspectives on health promotion effectiveness*. Berlin, Germany: Springer; 2007. p. 327-52.  
36  
37 522 17. Langford R, Campbell R, Magnus D, Bonell CP, Murphy SM, Waters E, et al. The WHO Health  
38 523 Promoting School framework for improving the health and well-being of students and staff. *Cochrane  
39 524 Database Syst Rev*. 2011;1.  
40  
41 525 18. Verrotti A, Penta L, Zenzeri L, Agostinelli S, De Feo P. Childhood obesity: prevention and strategies  
42 526 of intervention. A systematic review of school-based interventions in primary schools. *J Endocrinol  
43 527 Invest*. 2014;37(12):1155-64.  
44  
45 528 19. Cook-Cottone C, Casey CM, Feeley TH, Baran J. A meta-analytic review of obesity prevention in the  
46 529 schools: 1997–2008. *Psychol Sch*. 2009;46(8):695-719.  
47  
48  
49  
50  
51  
52  
53  
54  
55  
56  
57  
58  
59  
60

- 1  
2  
3 530 20.Oosterhoff M, Joore M, Ferreira I. The effects of school-based lifestyle interventions on body mass  
4  
5 531 index and blood pressure: a multivariate multilevel meta-analysis of randomized controlled trials. *Obes*  
6  
7 532 *Rev.* 2016;17(11):1131-53.
- 8  
9 533 21.Deschesnes M, Martin C, Hill AJ. Comprehensive approaches to school health promotion: how to  
10  
11 534 achieve broader implementation? *Health Promot Int.* 2003;18(4):387-96.
- 12  
13 535 22.Darlington EJ, Violon N, Jourdan D. Implementation of health promotion programmes in schools: an  
14  
15 536 approach to understand the influence of contextual factors on the process? *BMC Public Health.*  
16  
17 537 2018;18(1):163.
- 18  
19 538 23.Keshavarz N, Nutbeam D, Rowling L, Khavarpour F. Schools as social complex adaptive systems:  
20  
21 539 a new way to understand the challenges of introducing the health promoting schools concept. *Soc Sci*  
22  
23 540 *Med.* 2010;70(10):1467-74.
- 24  
25 541 24.Moore GF, Audrey S, Barker M, Bond L, Bonell C, Hardeman W, et al. Process evaluation of complex  
26  
27 542 interventions: Medical Research Council guidance. *BMJ.* 2015;350:h1258.
- 28  
29 543 25.Hawe P, Shiell A, Riley T. Theorising interventions as events in systems. *Am J Commun Psychol.*  
30  
31 544 2009;43(3-4):267-76.
- 32  
33 545 26.Mason M. What is complexity theory and what are its implications for educational change? *Educ*  
34  
35 546 *Philos Theory.* 2008;40(1):35-49.
- 36  
37 547 27.Stewart-Brown S. What is the Evidence on School Health Promotion in Improving Health Or  
38  
39 548 preventing Disease And, Specifically, what is the Effectiveness of the Health Promoting Schools  
40  
41 549 Approach? Copenhagen, Denmark: World Health Organization, Regional Office for Europe; 2006.
- 42  
43 550 28.Willeboordse M, Jansen M, van den Heijkant S, Simons A, Winkens B, de Groot R, et al. The Healthy  
44  
45 551 Primary School of the Future: study protocol of a quasi-experimental study. *BMC Public Health.*  
46  
47 552 2016;16(1):1.
- 48  
49 553 29.Bartelink N, van Assema P, Jansen M, Savelberg H, Willeboordse M, Kremers S. The Healthy  
50  
51 554 Primary School of the Future: A Contextual Action-Oriented Research Approach. *Int J Environ Res*  
52  
53 555 *Public Health.* 2018;15(10):2243.
- 54  
55 556 30.Young I, St Leger L, Buijs G. School health promotion: evidence for effective action. *Background*  
56  
57 557 *paper SHE factsheet.* 2013;2.
- 58  
59  
60

- 1  
2  
3 558 31. Bartelink N, van Assema P, Jansen M, Savelberg H, Moore G, Hawkings J, et al. Process evaluation  
4 559 of the Healthy primary School of the Future: The key learning points. BMC Public Health.  
5 560 2019;19(1):698.  
6  
7  
8 561 32. Bartelink NH, van Assema P, Kremers SP, Savelberg HH, Oosterhoff M, Willeboordse M, et al. One-  
9 562 and Two-Year Effects of the Healthy Primary School of the Future on Children's Dietary and Physical  
10 563 Activity Behaviours: A Quasi-Experimental Study. Nutrients. 2019;11(3):689.  
11  
12  
13 564 33. Gezondheidsraad. Dutch Dietary Guidelines 2015. The Hague, The Netherlands: Health Council of  
14 565 the Netherlands; 2015.  
15  
16  
17 566 34. Vermeer AJM, Boot NMWM, Hesdahl MH, Janssen-Goffin MJH, Linssen ECAJ, Rutten N, et al.  
18 567 Lokale rapporten Volksgezondheid Toekomst Verkenning: Een nieuwe kijk op gezondheid in Heerlen,  
19 568 Kerkrade, Landgraaf en Brunssum; [Local reports on Public Health Development: A new perspective on  
20 569 health in Heerlen, Kerkrade, Landgraaf and Brunssum]. Geleen: GGD Zuid Limburg; 2014.  
21  
22  
23 570 35. Shavers VL. Measurement of socioeconomic status in health disparities research. J Natl Med Assoc.  
24 571 2007;99(9):1013.  
25  
26  
27 572 36. Keij I. Hoe doet het CBS dat nou? Standaarddefinitie allochtonen [How does Statistics Netherlands  
28 573 do this? Standard definition of emigrants]. 2000.  
29  
30  
31 574 37. Cole TJ, Bellizzi MC, Flegal KM, Dietz WH. Establishing a standard definition for child overweight  
32 575 and obesity worldwide: international survey. BMJ. 2000;320(7244):1240.  
33  
34  
35 576 38. Volksgezondheidszorg.info. Overgewicht kinderen [Overweight children] 2017 [Available from:  
36 577 [https://www.volksgezondheidszorg.info/onderwerp/overgewicht/cijfers-context/huidige-situatie#node-](https://www.volksgezondheidszorg.info/onderwerp/overgewicht/cijfers-context/huidige-situatie#node-overgewicht-kinderen)  
37 578 [overgewicht-kinderen](https://www.volksgezondheidszorg.info/onderwerp/overgewicht/cijfers-context/huidige-situatie#node-overgewicht-kinderen).  
38  
39  
40  
41 579 39. Lipsey MW. Design sensitivity: Statistical power for experimental research. Pugey, France: Sage;  
42 580 1990.  
43  
44  
45 581 40. Lister-Sharp D, Chapman S, Stewart-Brown S, Sowden A. Health promoting schools and health  
46 582 promotion in schools: two systematic reviews. In Database of Abstracts of Reviews of Effects (DARE):  
47 583 Quality-assessed Reviews [Internet]. London, UK: Centre for Reviews and Dissemination; 1999.  
48  
49  
50 584 41. Hill JO, Wyatt HR, Melanson EL. Genetic and environmental contributions to obesity. Med Clin North  
51 585 Am. 2000;84(2):333-46.  
52  
53  
54  
55  
56  
57  
58  
59  
60



1  
2  
3 586 42.Kremers SP, De Bruijn G-J, Visscher TL, Van Mechelen W, De Vries NK, Brug J. Environmental  
4  
5 587 influences on energy balance-related behaviors: a dual-process view. *Int J Behav Nutr Phys Act.*  
6  
7 588 2006;3(1):9.

8  
9 589 43.Lorenc T, Petticrew M, Welch V, Tugwell P. What types of interventions generate inequalities?  
10  
11 590 Evidence from systematic reviews. *J Epidemiol Community Health.* 2013;67(2):190-3.

12  
13 591 44.Boudewijns E, Pepels J, van Kann D, Konings K, van Schayck C, Willeboordse M. Non-response  
14  
15 592 and external validity in a school-based quasi-experimental study 'The Healthy Primary School of the  
16  
17 593 Future': A cross-sectional assessment. *Prev Med Rep.* 2019:100874.

18 594  
19  
20  
21  
22  
23  
24  
25  
26  
27  
28  
29  
30  
31  
32  
33  
34  
35  
36  
37  
38  
39  
40  
41  
42  
43  
44  
45  
46  
47  
48  
49  
50  
51  
52  
53  
54  
55  
56  
57  
58  
59  
60

For peer review only

595 **Figure 1. Flowchart**

596  
 597 \* Reasons for drop-out T1: switched to other included school (n=2), other reasons, e.g., moved away or actively  
 598 stopped participation (n=62).  
 599 \*\* Reasons for drop-out T2: finished school (n=228), switched to other included school (n=17), other reasons e.g.  
 600 moved away or actively stopped participation (n=45).  
 601 \*\*\*Selection for effect study: at baseline (T0) children from study year one to seven, at T1 children from study year  
 602 two to eight, and at T2 children from study year three to eight.

604 **Table 1. Characteristics of study sample at baseline (T0)**

|                         | Total          |                | Full HPSF |                | Partial HPSF |                | Control |                | Chi-square / F-value | p-value     |
|-------------------------|----------------|----------------|-----------|----------------|--------------|----------------|---------|----------------|----------------------|-------------|
|                         | N <sup>a</sup> | Mean (±SD) % / | N         | Mean (±SD) % / | N            | Mean (±SD) % / | N       | Mean (±SD) % / |                      |             |
| Gender (% boys)         | 1676           | 47.4%          | 537       | 47.7%          | 478          | 47.3%          | 661     | 47.2%          | .029 <sup>c</sup>    | .986        |
| Age (years)             | 1676           | 7.5 (±2.16)    | 537       | 7.6 (±2.16)    | 478          | 7.4 (±2.22)    | 661     | 7.6 (±2.13)    | 1.610                | .200        |
| Study year <sup>b</sup> | 1676           | 4.0 (±2.00)    | 537       | 4.0 (±2.00)    | 478          | 3.8 (±2.01)    | 661     | 4.1 (±1.99)    | 2.526                | .080        |
| Ethnicity (% Western)   | 1016           | 94.1%          | 341       | 93.0%          | 326          | 96.0%          | 349     | 93.4%          | 3.239 <sup>c</sup>   | .198        |
| SES                     |                |                |           |                |              |                |         |                |                      |             |
| Lowest tertile          | 1117           | 32.6%          | 361       | 28.8%          | 365          | 32.3%          | 391     | 36.3%          | 5.636 <sup>c</sup>   | .228        |
| Middle tertile          |                | 34.0%          |           | 35.7%          |              | 35.6%          |         | 30.9%          |                      |             |
| Highest tertile         |                | 33.4%          |           | 35.5%          |              | 32.1%          |         | 32.7%          |                      |             |
| BMI z-score             | 1109           | .135 (±1.02)   | 321       | .051 (±1.01)   | 352          | .092 (±.95)    | 436     | .232 (±1.07)   | 3.399                | <b>.034</b> |
| Overweight/ obese (%)   | 1109           | 19.9%          | 321       | 16.5%          | 352          | 17.9%          | 436     | 24.1%          | 14.156 <sup>c</sup>  | <b>.006</b> |

605 <sup>a</sup> Observed N, missing data was due to later participation in the study, incomplete parent questionnaire, or because  
 606 no height/weight was measured in study year 1.

607 <sup>b</sup> Study year 1-8 in Dutch system is comparable to two years of kindergarten followed by grade 1-6.

608 <sup>c</sup> Chi-square test.

609 Bold p-value = significant (<.05) difference

610 Abbreviations: SD = standard deviation; C.I. = confidence interval; ES = Effect size.

615 **Figure 2. Observed change in children’s BMI z-score at one year and two years’ follow-up compared with baseline**

620 **Table 2. One- and two-year estimated intervention effects on children’s BMI z-score<sup>a</sup>**

|             |    | Full HPSF vs. control  |            |      | Partial HPSF vs. control |            |      | Full HPSF vs. Partial HPSF |     |      |
|-------------|----|------------------------|------------|------|--------------------------|------------|------|----------------------------|-----|------|
|             |    | B (95% C.I.)           | p          | ES   | B (95% C.I.)             | p          | ES   | B (95% C.I.)               | p   | ES   |
| BMI z-score | T1 | -0.038 (-0.09 - 0.01)  | .15        | -.04 | -0.051 (-0.10 - -0.01)   | <b>.03</b> | -.05 | 0.013 (-0.04 - 0.06)       | .62 | .01  |
|             | T2 | -0.083 (-0.15 - -0.02) | <b>.01</b> | -.08 | -0.066 (-0.13 - 0.00)    | <b>.05</b> | -.07 | -0.017 (-0.09 - 0.05)      | .63 | -.02 |

621 <sup>a</sup> Adjusted for baseline, gender, study year at T0, SES, and ethnicity.

622 Bold p-value = significant (<.05) difference

623 Abbreviations: C.I. = confidence interval; ES = Effect size.

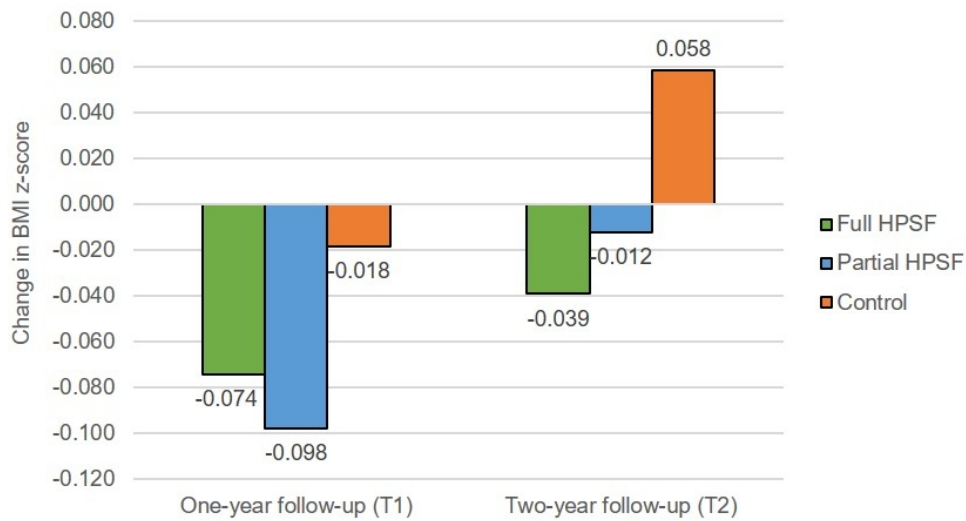

\* Reasons for drop-out T1: switched to other included school (n=2), other reasons, e.g., moved away or actively stopped participation (n=62).

\*\* Reasons for drop-out T2: finished school (n=228), switched to other included school (n=17), other reasons e.g. moved away or actively stopped participation (n=45).

\*\*\*Selection for effect study: at baseline (T0) children from study year one to seven, at T1 children from study year two to eight, and at T2 children from study year three to eight.

144x77mm (150 x 150 DPI)

1  
2  
3  
4  
5  
6  
7  
8  
9  
10  
11  
12  
13  
14  
15  
16  
17  
18  
19  
20  
21  
22  
23  
24  
25  
26  
27  
28  
29  
30  
31  
32  
33  
34  
35  
36  
37  
38  
39  
40  
41  
42  
43  
44  
45  
46  
47  
48  
49  
50  
51  
52  
53  
54  
55  
56  
57  
58  
59  
60

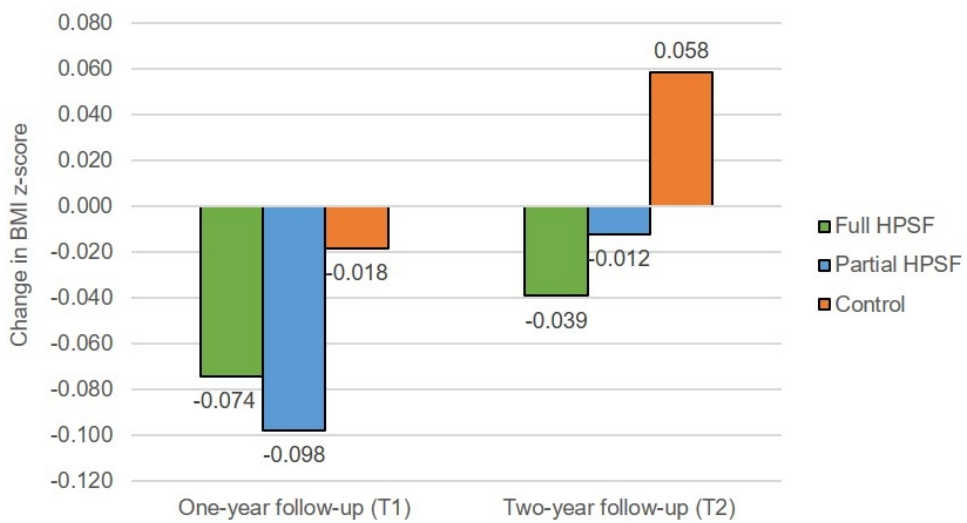

144x77mm (150 x 150 DPI)

Supplementary file 1

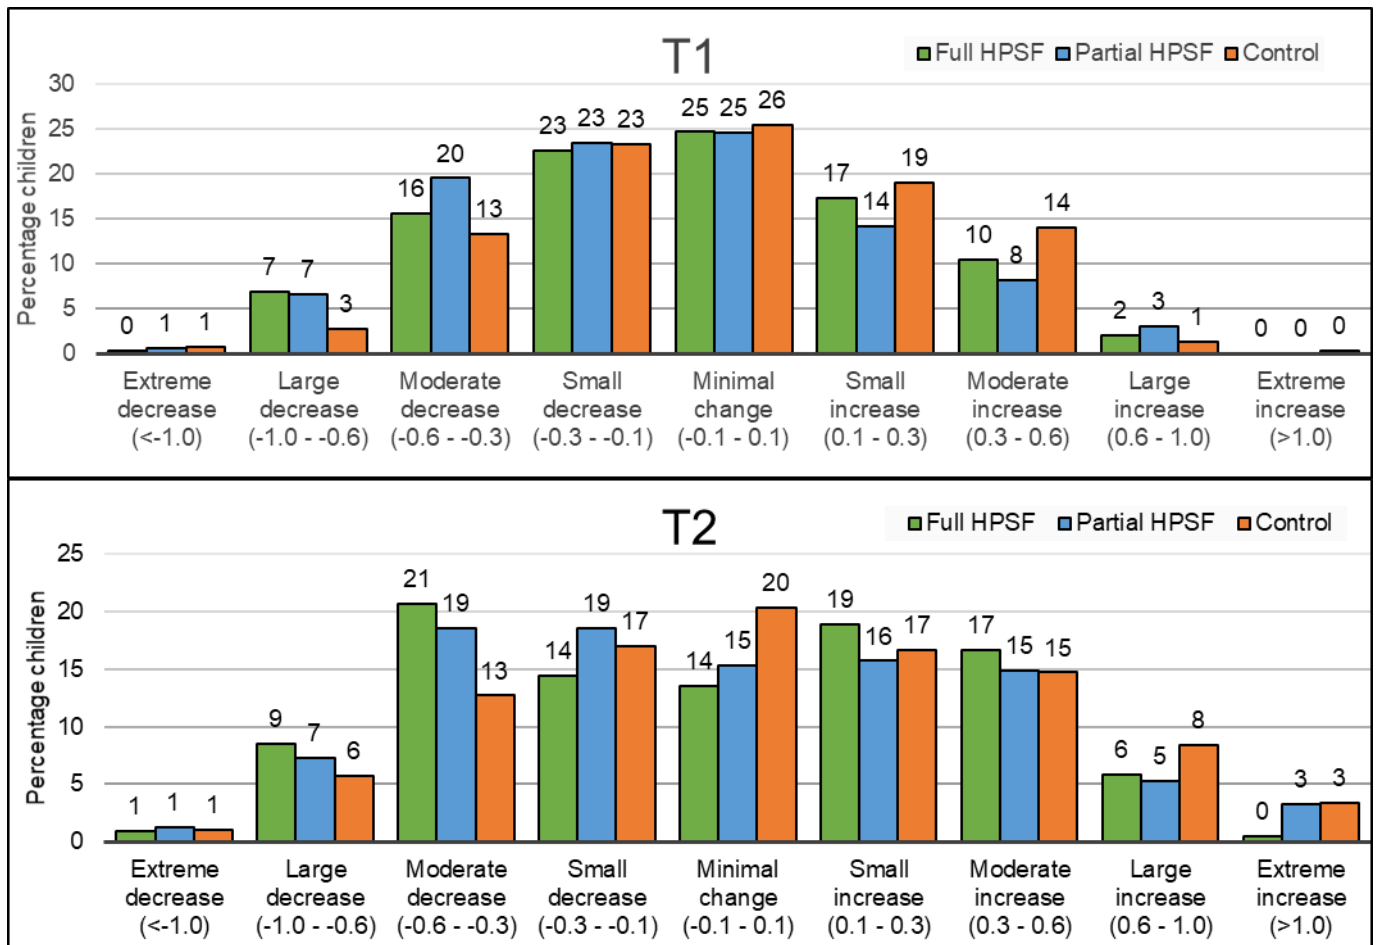

Figure S1. Graphical presentation of individual changes in BMI z-scores at one year (T1) and two years' (T2) follow-up compared with baseline

**Table S1. Potential effect-modifiers of the intervention effects on children's BMI z-score <sup>a</sup>**

|                                      | N <sup>b</sup> | Full HPSF vs. control  |                |      | Partial HPSF vs. control |      |      | Full HPSF vs. Partial HPSF |      |      |
|--------------------------------------|----------------|------------------------|----------------|------|--------------------------|------|------|----------------------------|------|------|
|                                      |                | B (95% C.I.)           | p              | ES   | B (95% C.I.)             | p    | ES   | B (95% C.I.)               | p    | ES   |
| <b>AFTER ONE-YEAR FOLLOW-UP (T1)</b> |                |                        |                |      |                          |      |      |                            |      |      |
| <b>Gender</b>                        |                |                        |                |      |                          |      |      |                            |      |      |
| Interaction-term                     |                |                        | .73            |      |                          | .70  |      |                            | .47  |      |
| Boys                                 | 794            | -0.046 (-0.11 - 0.02)  | .18            | -.05 | -0.041 (-0.11 - 0.03)    | .22  | -.04 | -0.005 (-0.08 - 0.07)      | .89  | -.01 |
| Girls                                | 882            | -0.030 (-0.10 - 0.04)  | .38            | -.03 | -0.060 (-0.12 - 0.00)    | .07  | -.06 | 0.029 (-0.04 - 0.10)       | .39  | .03  |
| <b>Study year</b>                    |                |                        |                |      |                          |      |      |                            |      |      |
| Interaction-term                     |                |                        | .60            |      |                          | .63  |      |                            | .98  |      |
| 1-4                                  | 970            | -0.027 (-0.09 - 0.04)  | .43            | -.03 | -0.039 (-0.10 - 0.02)    | .23  | -.04 | 0.011 (-0.05 - 0.08)       | .73  | .01  |
| 165-8                                | 706            | -0.052 (-0.12 - 0.02)  | .15            | -.05 | -0.062 (-0.13 - 0.01)    | .07  | -.06 | 0.010 (-0.07 - 0.09)       | .79  | .01  |
| <b>SES</b>                           |                |                        |                |      |                          |      |      |                            |      |      |
| Interaction-term <sup>c</sup>        |                |                        | ≥.35           |      |                          | ≥.71 |      |                            | ≥.42 |      |
| Low                                  | 364            | -0.058 (-0.15 - 0.03)  | .19            | -.06 | -0.056 (-0.14 - 0.03)    | .19  | -.06 | -0.002 (-0.10 - 0.10)      | .96  | .00  |
| Middle                               | 380            | -0.005 (-0.09 - 0.08)  | .91            | .00  | -0.050 (-0.13 - 0.03)    | .24  | -.05 | 0.046 (-0.04 - 0.13)       | .29  | .05  |
| High                                 | 373            | -0.036 (-0.12 - 0.05)  | .39            | -.04 | -0.034 (-0.12 - 0.05)    | .42  | -.03 | -0.003 (-0.09 - 0.08)      | .95  | .00  |
| <b>Weight status at baseline</b>     |                |                        |                |      |                          |      |      |                            |      |      |
| Interaction-term                     |                |                        | .90            |      |                          | .32  |      |                            | .30  |      |
| Non-overweight                       | 888            | -0.039 (-0.10 - 0.02)  | .17            | -.05 | -0.039 (-0.09 - 0.01)    | .12  | -.05 | 0.000 (-0.06 - 0.06)       | .99  | .00  |
| Overweight                           | 221            | -0.032 (-0.14 - 0.08)  | .58            | -.04 | -0.100 (-0.21 - 0.01)    | .07  | -.14 | 0.069 (-0.05 - 0.18)       | .24  | .09  |
| <b>AFTER TWO-YEAR FOLLOW-UP (T2)</b> |                |                        |                |      |                          |      |      |                            |      |      |
| <b>Gender</b>                        |                |                        |                |      |                          |      |      |                            |      |      |
| Interaction-term                     |                |                        | .57            |      |                          | .94  |      |                            | .54  |      |
| Boys                                 | 794            | -0.101 (-0.19 - -0.01) | <b>.03</b>     | -.10 | -0.063 (-0.15 - 0.03)    | .18  | -.06 | -0.038 (-0.13 - 0.06)      | .43  | -.04 |
| Girls                                | 882            | -0.066 (-0.15 - 0.02)  | .13            | -.07 | -0.068 (-0.16 - 0.02)    | .13  | -.07 | 0.002 (-0.09 - 0.10)       | .97  | .00  |
| <b>Study year</b>                    |                |                        |                |      |                          |      |      |                            |      |      |
| Interaction-term                     |                |                        | .18            |      |                          | .75  |      |                            | .33  |      |
| 1-4                                  | 970            | -0.046 (-0.13 - 0.04)  | .29            | -.05 | -0.052 (-0.13 - 0.03)    | .21  | -.05 | 0.006 (-0.08 - 0.09)       | .89  | .01  |
| 5-8                                  | 706            | -0.130 (-0.23 - -0.03) | <b>&lt;.01</b> | -.13 | -0.072 (-0.17 - 0.03)    | .16  | -.07 | -0.058 (-0.16 - 0.05)      | .27  | -.06 |
| <b>SES</b>                           |                |                        |                |      |                          |      |      |                            |      |      |
| Interaction-term <sup>c</sup>        |                |                        | ≥.52           |      |                          | ≥.85 |      |                            | ≥.64 |      |
| Low                                  | 364            | -0.103 (-0.22 - 0.02)  | .10            | -.10 | -0.067 (-0.18 - 0.05)    | .24  | -.07 | -0.036 (-0.16 - 0.09)      | .58  | -.04 |
| Middle                               | 380            | -0.049 (-0.16 - 0.06)  | .39            | -.05 | -0.056 (-0.18 - 0.06)    | .35  | -.06 | 0.007 (-0.11 - 0.13)       | .91  | .01  |
| High                                 | 373            | -0.063 (-0.18 - 0.05)  | .28            | -.06 | -0.051 (-0.16 - 0.06)    | .38  | -.05 | -0.012 (-0.12 - 0.10)      | .84  | -.01 |
| <b>Weight status at baseline</b>     |                |                        |                |      |                          |      |      |                            |      |      |
| Interaction-term                     |                |                        | .82            |      |                          | .92  |      |                            | .90  |      |
| Non-overweight                       | 888            | -0.088 (-0.16 - -0.02) | <b>.02</b>     | -.12 | -0.069 (-0.14 - 0.00)    | .06  | -.09 | -0.019 (-0.09 - 0.06)      | .61  | -.03 |
| Overweight                           | 221            | -0.069 (-0.22 - -0.08) | .36            | -.09 | -0.061 (-0.20 - 0.08)    | .40  | -.08 | -0.008 (-0.17 - 0.15)      | .92  | -.01 |

<sup>a</sup> Adjusted for baseline, gender, study year at T0, SES, and ethnicity.

<sup>b</sup> Observed N per subgroup. Missing data were due to: later participation in the study, incomplete parent questionnaire, no measurement of height/weight, or drop-out during the study.

<sup>c</sup> Pair-wise comparisons:

T1, Full HPSF vs. Control: low vs. middle (p=.35), low vs. high (p=.71), middle vs. high (p=.58).

T1, Partial HPSF vs. Control: low vs. middle (p=.93), low vs. high (p=.71), middle vs. high (p=.79).

T1, Full HPSF vs. Partial HPSF: low vs. middle (p=.48), low vs. high (p=1.00), middle vs. high (p=.42).

T2, Full HPSF vs. Control: low vs. middle (p=.52), low vs. high (p=.64), middle vs. high (p=.87).

T2, Partial HPSF vs. Control: low vs. middle (p=.90), low vs. high (p=.85), middle vs. high (p=.95).

T2, Full HPSF vs. Partial HPSF: low vs. middle (p=.64), low vs. high (p=.78), middle vs. high (p=.81).

Bold p-value = significant difference (interaction term: p ≤.10; subgroups: p ≤.05)

Abbreviations: C.I. = Confidence Interval; ES = Effect Size; p = p-value; SES = Socio-Economic Status.
