# Supplementary material for: Can the Healthy Primary School of the Future offer perspective in the ongoing obesity epidemic in young children? A Dutch quasi-experimental study
Source: PubMed Central journal article supplement — BMJ Open. 2019 Oct 31;9(10):e030676. doi: 10.1136/bmjopen-2019-030676 (PMC6830668; doi:10.1136/bmjopen-2019-030676), 2019-10-31
Supplement: bmjopen-2019-030676supp001.pdf [file bmjopen-2019-030676supp001.pdf]

## Supplementary file 1

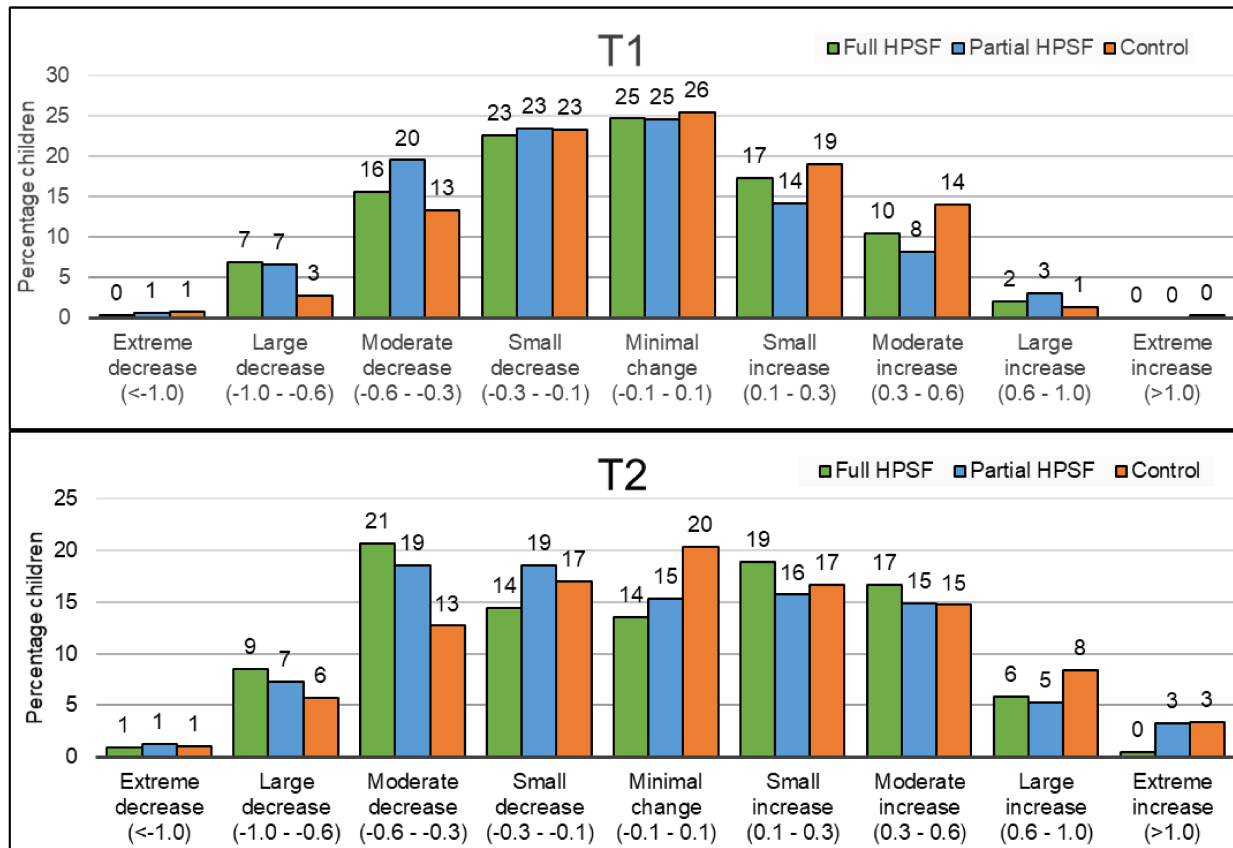

**Figure S1. Graphical presentation of individual changes in BMI z-scores at one year (T1) and two years' (T2) follow-up compared with baseline**

Table S1. Potential effect-modifiers of the intervention effects on children's BMI z-score <sup>a</sup>

| N <sup>b</sup>                       | Full HPSF vs. control |                        |                | Partial HPSF vs. control |                       |      | Full HPSF vs. Partial HPSF |                       |      |      |
|--------------------------------------|-----------------------|------------------------|----------------|--------------------------|-----------------------|------|----------------------------|-----------------------|------|------|
|                                      | B (95% C.I.)          | p                      | ES             | B (95% C.I.)             | p                     | ES   | B (95% C.I.)               | p                     | ES   |      |
| <b>AFTER ONE-YEAR FOLLOW-UP (T1)</b> |                       |                        |                |                          |                       |      |                            |                       |      |      |
| <b>Gender</b>                        |                       |                        |                |                          |                       |      |                            |                       |      |      |
| Interaction-term                     |                       |                        | .73            |                          |                       | .70  |                            |                       | .47  |      |
| - Boys                               | 794                   | -0.046 (-0.11 - 0.02)  | .18            | -.05                     | -0.041 (-0.11 - 0.03) | .22  | -.04                       | -0.005 (-0.08 - 0.07) | .89  | -.01 |
| - Girls                              | 882                   | -0.030 (-0.10 - 0.04)  | .38            | -.03                     | -0.060 (-0.12 - 0.00) | .07  | -.06                       | 0.029 (-0.04 - 0.10)  | .39  | .03  |
| <b>Study year</b>                    |                       |                        |                |                          |                       |      |                            |                       |      |      |
| Interaction-term                     |                       |                        | .60            |                          |                       | .63  |                            |                       | .98  |      |
| - 1-4                                | 970                   | -0.027 (-0.09 - 0.04)  | .43            | -.03                     | -0.039 (-0.10 - 0.02) | .23  | -.04                       | 0.011 (-0.05 - 0.08)  | .73  | .01  |
| - 5-8                                | 706                   | -0.052 (-0.12 - 0.02)  | .15            | -.05                     | -0.062 (-0.13 - 0.01) | .07  | -.06                       | 0.010 (-0.07 - 0.09)  | .79  | .01  |
| <b>SES</b>                           |                       |                        |                |                          |                       |      |                            |                       |      |      |
| Interaction-term <sup>c</sup>        |                       |                        | ≥.35           |                          |                       | ≥.71 |                            |                       | ≥.42 |      |
| - Low                                | 364                   | -0.058 (-0.15 - 0.03)  | .19            | -.06                     | -0.056 (-0.14 - 0.03) | .19  | -.06                       | -0.002 (-0.10 - 0.10) | .96  | .00  |
| - Middle                             | 380                   | -0.005 (-0.09 - 0.08)  | .91            | .00                      | -0.050 (-0.13 - 0.03) | .24  | -.05                       | 0.046 (-0.04 - 0.13)  | .29  | .05  |
| - High                               | 373                   | -0.036 (-0.12 - 0.05)  | .39            | -.04                     | -0.034 (-0.12 - 0.05) | .42  | -.03                       | -0.003 (-0.09 - 0.08) | .95  | .00  |
| <b>Weight status at baseline</b>     |                       |                        |                |                          |                       |      |                            |                       |      |      |
| Interaction-term                     |                       |                        | .90            |                          |                       | .32  |                            |                       | .30  |      |
| - Non-overweight                     | 888                   | -0.039 (-0.10 - 0.02)  | .17            | -.05                     | -0.039 (-0.09 - 0.01) | .12  | -.05                       | 0.000 (-0.06 - 0.06)  | .99  | .00  |
| - Overweight                         | 221                   | -0.032 (-0.14 - 0.08)  | .58            | -.04                     | -0.100 (-0.21 - 0.01) | .07  | -.14                       | 0.069 (-0.05 - 0.18)  | .24  | .09  |
| <b>AFTER TWO-YEAR FOLLOW-UP (T2)</b> |                       |                        |                |                          |                       |      |                            |                       |      |      |
| <b>Gender</b>                        |                       |                        |                |                          |                       |      |                            |                       |      |      |
| Interaction-term                     |                       |                        | .57            |                          |                       | .94  |                            |                       | .54  |      |
| - Boys                               | 794                   | -0.101 (-0.19 - -0.01) | .03            | -.10                     | -0.063 (-0.15 - 0.03) | .18  | -.06                       | -0.038 (-0.13 - 0.06) | .43  | -.04 |
| - Girls                              | 882                   | -0.066 (-0.15 - 0.02)  | .13            | -.07                     | -0.068 (-0.16 - 0.02) | .13  | -.07                       | 0.002 (-0.09 - 0.10)  | .97  | .00  |
| <b>Study year</b>                    |                       |                        |                |                          |                       |      |                            |                       |      |      |
| Interaction-term                     |                       |                        | .18            |                          |                       | .75  |                            |                       | .33  |      |
| - 1-4                                | 970                   | -0.046 (-0.13 - 0.04)  | .29            | -.05                     | -0.052 (-0.13 - 0.03) | .21  | -.05                       | 0.006 (-0.08 - 0.09)  | .89  | .01  |
| - 5-8                                | 706                   | -0.130 (-0.23 - -0.03) | <b>&lt;.01</b> | -.13                     | -0.072 (-0.17 - 0.03) | .16  | -.07                       | -0.058 (-0.16 - 0.05) | .27  | -.06 |
| <b>SES</b>                           |                       |                        |                |                          |                       |      |                            |                       |      |      |
| Interaction-term <sup>c</sup>        |                       |                        | ≥.52           |                          |                       | ≥.85 |                            |                       | ≥.64 |      |
| - Low                                | 364                   | -0.103 (-0.22 - 0.02)  | .10            | -.10                     | -0.067 (-0.18 - 0.05) | .24  | -.07                       | -0.036 (-0.16 - 0.09) | .58  | -.04 |
| - Middle                             | 380                   | -0.049 (-0.16 - 0.06)  | .39            | -.05                     | -0.056 (-0.18 - 0.06) | .35  | -.06                       | 0.007 (-0.11 - 0.13)  | .91  | .01  |
| - High                               | 373                   | -0.063 (-0.18 - 0.05)  | .28            | -.06                     | -0.051 (-0.16 - 0.06) | .38  | -.05                       | -0.012 (-0.12 - 0.10) | .84  | -.01 |
| <b>Weight status at baseline</b>     |                       |                        |                |                          |                       |      |                            |                       |      |      |
| Interaction-term                     |                       |                        | .82            |                          |                       | .92  |                            |                       | .90  |      |
| - Non-overweight                     | 888                   | -0.088 (-0.16 - -0.02) | .02            | -.12                     | -0.069 (-0.14 - 0.00) | .06  | -.09                       | -0.019 (-0.09 - 0.06) | .61  | -.03 |
| - Overweight                         | 221                   | -0.069 (-0.22 - -0.08) | .36            | -.09                     | -0.061 (-0.20 - 0.08) | .40  | -.08                       | -0.008 (-0.17 - 0.15) | .92  | -.01 |

<sup>a</sup> Adjusted for baseline, gender, study year at T0, SES, and ethnicity.

<sup>b</sup> Observed N per subgroup. Missing data were due to: later participation in the study, incomplete parent questionnaire, no measurement of height/weight, or drop-out during the study.

<sup>c</sup> Pair-wise comparisons:

T1, Full HPSF vs. Control: low vs. middle (p=.35), low vs. high (p=.71), middle vs. high (p=.58).

T1, Partial HPSF vs. Control: low vs. middle (p=.93), low vs. high (p=.71), middle vs. high (p=.79).

T1, Full HPSF vs. Partial HPSF: low vs. middle (p=.48), low vs. high (p=1.00), middle vs. high (p=.42).

T2, Full HPSF vs. Control: low vs. middle (p=.52), low vs. high (p=.64), middle vs. high (p=.87).

T2, Partial HPSF vs. Control: low vs. middle (p=.90), low vs. high (p=.85), middle vs. high (p=.95).

T2, Full HPSF vs. Partial HPSF: low vs. middle (p=.64), low vs. high (p=.78), middle vs. high (p=.81).

Bold p-value = significant difference (interaction term: p ≤ .10; subgroups: p ≤ .05)

Abbreviations: C.I. = Confidence Interval; ES = Effect Size; p = p-value; SES = Socio-Economic Status.
